# Supplementary material for: Tracking the impact of research on policy and practice: investigating the feasibility of using citations in clinical guidelines for research evaluation
Source: PubMed Central journal article supplement — BMJ Open. 2012 Mar 30;2(2):e000897. doi: 10.1136/bmjopen-2012-000897 (PMC3317168; doi:10.1136/bmjopen-2012-000897), 2012-03-30
Supplement: bmjopen-2012-000897.draft_revisions.pdf [file bmjopen-2012-000897.draft_revisions.pdf]

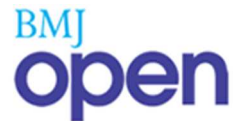

**Tracking the impact of research on policy and practice: a protocol for the use of clinical guidelines in research evaluation**

|                                 |                                                                                                                                                                                                                                                                                                                                               |
|---------------------------------|-----------------------------------------------------------------------------------------------------------------------------------------------------------------------------------------------------------------------------------------------------------------------------------------------------------------------------------------------|
| Journal:                        | <i>BMJ Open</i>                                                                                                                                                                                                                                                                                                                               |
| Manuscript ID:                  | bmjopen-2012-000897                                                                                                                                                                                                                                                                                                                           |
| Article Type:                   | Research                                                                                                                                                                                                                                                                                                                                      |
| Date Submitted by the Author:   | 23-Jan-2012                                                                                                                                                                                                                                                                                                                                   |
| Complete List of Authors:       | Kryl, David; Department of Health, National Institute of Health Research<br>Allen, Liz; Wellcome Trust, Strategic Planning & Policy Unit<br>Dolby, Kevin; Wellcome Trust, Strategic Planning & Policy Unit<br>Sherbon, Beverley; Medical Research Council, Strategy Directorate<br>Viney, Ian; Medical Research Council, Strategy Directorate |
| <b>Primary Subject Heading</b>: | Medical management                                                                                                                                                                                                                                                                                                                            |
| Secondary Subject Heading:      | Communication, Health informatics, Evidence based practice, Health policy                                                                                                                                                                                                                                                                     |
| Keywords:                       | GENERAL MEDICINE (see Internal Medicine), Health informatics < BIOTECHNOLOGY & BIOINFORMATICS, Protocols & guidelines < HEALTH SERVICES ADMINISTRATION & MANAGEMENT                                                                                                                                                                           |
|                                 |                                                                                                                                                                                                                                                                                                                                               |

SCHOLARONE™  
Manuscripts

## 1. Title page

Article title: Tracking the impact of research on policy and practice: a protocol for the use of clinical guidelines in research evaluation

Authors' names and institutional affiliations (Names, addresses, and positions of all authors plus email address for corresponding author):

| Author name      | Position                      | Department                            | Organisation                                                                   |
|------------------|-------------------------------|---------------------------------------|--------------------------------------------------------------------------------|
| David Kryl       | Head of Business Intelligence | National Institute of Health Research | Department of Health<br>79 Whitehall<br>London SW1A 2NS                        |
| Liz Allen        | Senior Evaluation Adviser     | Strategic Planning & Policy Unit      | Wellcome Trust<br>Gibbs Building<br>215 Euston Road<br>London NW1 2BE          |
| Kevin Dolby      | Evaluation Adviser            | Strategic Planning & Policy Unit      | Wellcome Trust                                                                 |
| Beverley Sherbon | Evaluation Programme Manager  | Strategy Group                        | Medical Research Council<br>14th Floor<br>One Kemble Street<br>London WC2B 4AN |
| Ian Viney        | Head of Evaluation            | Strategy Group                        | Medical Research Council                                                       |

Disclaimers: This paper reflects the opinions of the authors and does not necessarily reflect the opinions of their respective organisations.

Contact information for corresponding author:

Beverley Sherbon

Medical Research Council

1 Kemble Street

1  
2  
3 London , WC2B 4AN

4  
5 Phone: +44 (0)20 7395 2208

6  
7 Email

8  
9 beverley.sherbon@headoffice.mrc.ac.uk (this email address can be published)

10  
11  
12 Reprints are not available from the authors.

13  
14  
15 Source(s) of support: The authors are employed, or supported by, the Medical  
16  
17 Research Council, National Institute of Health Research and Wellcome Trust.  
18  
19

20  
21  
22 Word count (text only - excluding abstract, acknowledgments, figure legends, and  
23  
24 references): 3208

25  
26 Word count for the Abstract: 282

27  
28 Number of figures and tables: 4  
29  
30  
31

32 The Corresponding Author has the right to grant on behalf of all authors and does  
33  
34 grant on behalf of all authors, a non-exclusive licence on a worldwide basis to the  
35  
36 BMJ Publishing Group Ltd and its licensees, to permit this article (if accepted) to  
37  
38 be published in BMJ editions and any other BMJPG products and to exploit all  
39  
40 subsidiary rights, as set out in our licence  
41  
42 (<http://resources.bmj.com/bmj/authors/checklists-forms/licence-for-publication>)  
43  
44  
45  
46  
47  
48  
49  
50  
51  
52  
53  
54  
55  
56  
57  
58  
59  
60

## ***2. Conflicts of Interest Notification Page***

All authors have completed the Unified Competing Interest form at [www.icmje.org/coi\\_disclosure.pdf](http://www.icmje.org/coi_disclosure.pdf) (available on request from the corresponding author) and declare that (1) DK also holds the position of Research Leader at RAND Europe; and (2) DK, LA, KD, BS and IV have no non-financial interests that may be relevant to the submitted work.

For peer review only

### 3. Abstract

#### Introduction

In recent years, the medical research community has come under increasing pressure to demonstrate the value and extent of the impacts of its work . In response, funders have made considerable efforts to enhance their ability to track and understand the impact of their funded research. These efforts will provide evidence of the strategic significance and 'value' of investments into particular areas of research while also helping inform future funding strategies. However, determining the impact of research is challenging, particularly in the area of basic and fundamental research where the time lag between original research subsequent impacts on health can be long and the attribution difficult to disentangle.

Perhaps one of the most challenging areas of research impact evaluation is the quest to understand how and when research reaches policy and practice. Clinical guidelines, both national and international, bring together current high quality evidence concerning the prevention, diagnosis, prognosis and therapy of clinical problems. The inclusion of specific research results in the formulation of clinical guidelines presents us with an indication of research use in medical/clinical practice.

#### Methods and analysis

In 2009, the UK Medical Research Council, Wellcome Trust and Department of Health (England) commissioned a detailed analysis of research cited in two National Institute for Health and Clinical Excellence (NICE) UK clinical guidelines; Dementia and Chronic Obstructive Pulmonary Disease (COPD). The purpose was to explore the potential of using the guidelines as part of a toolkit to support impact tracking.

1  
2  
3  
4  
5  
6  
7  
8  
9  
10  
11  
12  
13  
14  
15  
16  
17  
18  
19  
20  
21  
22  
23  
24  
25  
26  
27  
28  
29  
30  
31  
32  
33  
34  
35  
36  
37  
38  
39  
40  
41  
42  
43  
44  
45  
46  
47  
48  
49  
50  
51  
52  
53  
54  
55  
56  
57  
58  
59  
60

Ethics

There were no ethical issues or considerations necessary for this study.

Dissemination

This paper presents an analysis of the research cited in clinical guidelines and considers how this type of information might have a more systematic role to play in enhancing our understanding of the pathways and time lags involved in research reaching policy and practice.

For peer review only

#### 4. Introduction

Medical research has advanced rapidly in recent times in all areas from basic sciences (i.e. decoding the human genome) through the development of more precise diagnostic tools to novel treatments. At the same time, public interest in biomedical advances and the appetite for more effective treatments<sup>1</sup> are increasing in parallel. The demand for the results of biomedical research to lead to improvement in healthcare has never been higher<sup>2, 3, 4</sup>.

Across the research world, and particularly in the biosciences, there has been a drive to better demonstrate and understand the impacts of research, essentially so that funds can be allocated to maximum effect. <sup>1</sup> There remains a concern that the research community as a whole could be better at translating the findings of medical research into tangible health and health care benefits<sup>5, 6, 7</sup>. Thus, the need to better understand research impact and the pathways to that impact is a key priority for research funders<sup>8, 9, 10, 11</sup>. However, determining the impact of research is challenging, and particularly in basic and fundamental research where the time lag between original research subsequent impacts on health can be long and the attribution difficult to track. In addition, perhaps one of the most challenging areas has been trying to understand the impact of research on policy and practice.

National and international clinical guidelines are intended to bring together the best and most current evidence about the prevention, diagnosis, prognosis and therapy of clinical problems. Clinical guidelines are a form of systematic review and, in the UK, focus on the defined medical needs of the National Health Service (NHS). In the UK, clinical guidelines are provided by the National Institute for Health and Clinical Excellence (NICE<sup>12</sup>) and, since 2005, these recommendations have had legal standing in the NHS in England and Wales. The guidelines exist to

1  
2  
3 help standardise and improve patient care and can help to introduce cost-  
4  
5 efficiencies to the delivery of health care. The guidelines are evidence-based and  
6  
7 their formulation brings pieces of important and influential research together. For  
8  
9 a funder, if research they have supported is referenced as part of the evidence  
10  
11 supporting a national and/or international clinical guideline, then it is a direct  
12  
13 indication that a piece of research is influencing policy and practice. Hence clinical  
14  
15 guidelines are potentially an attractive resource to support impact tracking and  
16  
17 assessment<sup>13, 14</sup>.

18  
19  
20  
21 For those engaged in evaluation, historically it has been difficult to extract  
22  
23 information from a guideline in a way that helps support analysis of the  
24  
25 references and funding sources: simply put, UK clinical guidelines are not  
26  
27 designed to support the requirements of funders trying to track the impact of  
28  
29 their support. However, work is underway at the National Centre for  
30  
31 Biotechnology Information (NCBI, part of the National Library of Medicine, NIH),  
32  
33 to digitise the content of major international clinical guidelines to encourage wider  
34  
35 access to their content and enable greater ability to mine their content and allow  
36  
37 automated links to individual cited research via databases such as PubMed.

38  
39  
40 In 2009, the UK Medical Research Council (MRC), Wellcome Trust and National  
41  
42 Institute of Health Research (NIHR) – who among them commit nearly £2bn  
43  
44 annually to support biomedical and applied health research - commissioned a  
45  
46 detailed analysis of the research cited on a small number of UK clinical guidelines  
47  
48 to explore the potential of the information in broader research impact tracking.  
49  
50 The objectives of this research were threefold. First, this study explored the  
51  
52 feasibility of *extracting* the funding source of the research papers cited on a  
53  
54 guideline. Second, it identified *who funded* the research cited in the selected  
55  
56 clinical guidelines. Third, it explored the extent to which there are shared  
57  
58 characteristics of the publications cited in these guidelines.  
59  
60



1  
2  
3  
4  
5 The then-current NICE guidelines for the management and treatment of two  
6  
7 disease areas were selected: Dementia (2006) and Chronic Obstructive  
8  
9 Pulmonary Disease (2004)<sup>15, 16</sup>. These guidelines were of interest for the purposes  
10  
11 of this analysis since (a) they had been available unchanged for several years,  
12  
13 and (b) there was a likelihood that all three project sponsor funders would have  
14  
15 funded some of the underlying research evidenced in the guidelines. The two  
16  
17 guidelines were also in quite different clinical areas, so we wanted to see if there  
18  
19 were differences in the process and/or adoption of research into practice. For  
20  
21 each guideline, all cited research was examined to pick out its characteristics  
22  
23 (e.g. age; bibliometric indicators) and identify any funding attributions.  
24  
25  
26  
27  
28  
29  
30  
31  
32  
33  
34  
35  
36  
37  
38  
39  
40  
41  
42  
43  
44  
45  
46  
47  
48  
49  
50  
51  
52  
53  
54  
55  
56  
57  
58  
59  
60

## 5. Methods

### Data extraction

The first step was to extract a list of publications from each of the guidelines and export them into a Microsoft Excel spreadsheet. This was performed automatically using bespoke RAND Europe computer scripts, based on the PERL scripting language. Here we briefly describe the methodology, since a full description is available elsewhere<sup>17</sup>. A total of 744 references were extracted from the Dementia guideline and 446 for the COPD guideline.

### Data cleaning

The extracted bibliographic references were cleaned and structured to permit analyses of funding source and paper performance indicators. Any references identified as non-academic, peer-reviewed publications (e.g. references to a website, grey literature) and all publications before 1980 were removed, since these could not be investigated using the Web of Science.

After extraction and initial cleaning, a total of 616 references were found for the Dementia guideline (79.4% of the original 776 references) and 412 references for the COPD guideline (83.9% of the original 491 references).

### Data processing

For the funding analyses, the extracted publications were searched for in Web of Science<sup>18</sup> to find the institution and country affiliations of the authors listed. One aim was to identify the publications with at least one UK author on the assumption that this would facilitate further funding analysis. Another aim was to use all the extracted publications for further bibliometric analysis (see <sup>19</sup> for a similar methodology).

From the Dementia guideline, 494 out of the 616 extracted publications

1  
2  
3 (80.1%) were found in the Web of Science. While from the COPD guideline, 335  
4 out of 412 publications were available (81.3%). Any publications not found in the  
5 Web of Science were processed individually through a search methodology  
6  
7 utilising the publication libraries of RAND Europe and Cambridge University. All  
8  
9 search processes were duplicated by a second researcher to eliminate errors.  
10  
11

12  
13  
14 This methodology used a simple search of both the RAND library by article title,  
15 using Google Scholar, and the Cambridge University online library and free access  
16  
17 journals, through the Google search engine. If the author affiliation and country  
18  
19 remained unidentified, then the RAND library was searched by journal, followed  
20  
21 by browsing for the article using the reference data available. In addition, the title  
22  
23 could be searched for by keyword within the journal. Finally, where possible,  
24  
25 Cambridge University print holdings were searched to find any articles that were  
26  
27 not accessible online.  
28  
29

### 30 31 **Funder acknowledgement** 32

33 Where publications had at least partial UK attribution, the funding source was  
34  
35 searched for in the Research Outputs Database (ROD)<sup>20, 21</sup>. This is a database  
36  
37 housed at the Wellcome Trust recording the funding sources for UK and Irish  
38  
39 publications in the biomedical sciences for the period 1988–2001. Funding  
40  
41 acknowledgements were found for around one-third of publications using this  
42  
43 database. For the remaining publications, which fell outside of the appropriate  
44  
45 date range or were not found in the ROD, the full text of the publication was  
46  
47 found and funding acknowledgements recorded directly, where available.  
48  
49

50  
51 Funding source references were then standardised and categorised by broad  
52  
53 sector. UK funders acknowledged on cited papers were categorised into the  
54  
55 following categories: industry, not-for-profit, hospital trust, government  
56  
57  
58  
59  
60

1  
2  
3 department, government agency (not controlled by ministries), local or regional  
4 authority, foundation, none given and unknown.  
5  
6  
7  
8

### 9 **Bibliometric & paper characteristic analysis**

10  
11 Author affiliations and country locations were identified for 595 of the 616 (97%)  
12 Dementia guideline publications and 402 of the 412 (98%) COPD guideline  
13 publications. These affiliated papers form the basis of the following descriptive  
14 and bibliometric analysis.  
15  
16  
17  
18

19  
20  
21 The citation impact of the publications referenced in both clinical guidelines was  
22 analysed by sector using the concept of citation profiling. This is based on a  
23 normalising technique called ReBased Impact (RBI), which takes account of the  
24 field in which a paper appears and the date since its publication to effectively  
25 provide a proxy measure for the 'quality' of each paper. The world average  
26 RBI=1; the most highly cited articles have an RBI >8<sup>22</sup>.  
27  
28  
29  
30  
31  
32

33  
34  
35 Whole counts were used throughout this analysis; if more than one funding  
36 source is cited in a publication, this was recorded as *one* publication for each  
37 funding source.  
38  
39  
40  
41  
42  
43  
44  
45  
46  
47  
48  
49  
50  
51  
52  
53  
54  
55  
56  
57  
58  
59  
60

## 6. Results

### **Attribution by funding organisation**

In a large proportion of cited papers, no funding acknowledgement was listed.

Nearly half (104 of the 228; 46%) of publications in the Dementia guideline with a UK author did not acknowledge any funder. Funding information was available for 117 papers, with the full text of 7 papers inaccessible and, hence, missing the funding information. For the 148 publications in the COPD guideline with at least one UK author, 60 included no funding acknowledgement (41%). Funding information was available for 81 publications. The full text of 7 publications was not accessible and therefore no funding data was available.

Examination of the funding acknowledgements for the Medical Research Council (MRC), Department of Health (England), NHS and the Wellcome Trust revealed that these funders were overtly linked to only a small proportion of papers cited on the guidelines (see figure 1 – Numbers of publications by funding source).

### **Attributions by funding organisation over time**

To determine whether the practice of acknowledgement of funding has improved over time, funding acknowledgement was analysed by year of publication.

Although it appears that more recent publications have more complete funding acknowledgements than older ones, over the whole period, and for both guidelines, there was no clear statistical relationship between the age of publication and the presence or absence of a funding acknowledgement (see figure 2 – Funding acknowledgement by year).

The clinical guidelines, on the whole, cited recent research; the majority of research papers cited in these two UK clinical guidelines were published after 2000 - that is, within five years of the release of these guidelines. Although the

1  
2  
3 average duration between the publication date of papers cited and the publication  
4 date of the citing guideline was 5 years for Dementia and 3 years for COPD.  
5  
6

### 7 8 **Attribution by funding sector** 9

10  
11 Industry was not as prominent a funding source for publications cited in the  
12 Dementia guideline, where acknowledgements were distributed across a range of  
13 funding sources across sectors. In the COPD guideline, industry was the most  
14 frequently linked funder after 'none given'.  
15  
16  
17  
18

### 19 20 21 **Attribution by country** 22

23  
24 Of the 616 publications extracted from the Dementia guideline, 228 (37.2%) had  
25 at least one UK-based author; while from the COPD guideline, 148 publications  
26 (35.9%) had at least one UK-based author. Researchers based in the UK and US  
27 combined were linked to the majority of papers cited in both guidelines.  
28  
29  
30  
31

32  
33  
34 Despite this dominance of the UK and USA-based researchers in the cited papers,  
35 many other countries contributed to these publications. Papers cited in the  
36 Dementia and COPD guidelines were linked to authors from 37 and 36 countries,  
37 respectively (see figure 3 – Contribution of the most active countries).  
38  
39  
40  
41

### 42 43 44 **Attribution by research sector** 45

46 The three research funders use different means of disbursing their money.  
47 Funding includes grants to universities and hospitals, alongside direct support for  
48 intramural research. Publication analysis by associated institutions revealed that  
49 researchers with university addresses, followed by those with hospital addresses,  
50 were linked to the bulk of papers cited on both guidelines. More than 80% of  
51 publications cited in the two guidelines involved authors based at universities.  
52  
53  
54  
55  
56  
57  
58  
59  
60

1  
2  
3 The scientific contribution from other types of publicly funded institutions, as well  
4  
5 as from non-profit institutions was low.  
6  
7

8  
9 As described, nearly 20% of the publications cited in the COPD guideline involved  
10  
11 authors from industry - a slightly higher proportion than in the Dementia  
12  
13 guideline.  
14

### 15 16 17 **Citation quality**

18  
19 Clinical guideline drafting committees are obliged to base their recommendations  
20  
21 on the 'best' research available. The citation impact of the publications referenced  
22  
23 in both clinical guidelines was analysed by sector using the concept of citation  
24  
25 profiling.  
26  
27

28  
29 Overall papers cited across both guidelines had high RBIs. Papers linked to  
30  
31 universities, companies (industry) and publicly-funded research institutions were  
32  
33 particularly highly cited. At the time of the analysis, for the COPD guideline, cited  
34  
35 papers linked to publicly-funded research institutions had  $RBI > 8$ ; for the  
36  
37 dementia guideline papers linked to universities, companies and publicly-funded  
38  
39 research institutions all had particularly impressive RBIs (see figure 4 – Citation  
40  
41 score by institutional sector).  
42  
43  
44  
45  
46  
47  
48  
49  
50  
51  
52  
53  
54  
55  
56  
57  
58  
59  
60

## 7. Discussion

### Funding attribution

Perhaps the greatest challenge in research impact assessment is dealing with attribution. Attribution of research outcomes and impacts to a specific funder is complex and, in many cases, improbable. This arises from most medical research receiving funding from multiple sources, involving a host of researchers (often across institutions) and being incremental such that considerable time elapses between original research and impact on health. The tide has turned on this issue and funding bodies are increasingly working together to identify where their funding has made a difference and contributed to an outcome or impact. Exclusively 'claiming' impact ignores the complexities and reality of scientific research and we are more interested in noting our contribution alongside others and learning from this.

Nevertheless, there is much we can do to help us better understand the connection between funding inputs and changes in medical practice. This research project was intended to flesh out some of the issues that we face in trying to link research funding to research output (i.e. research papers) and specific outcomes (clinical guidelines).

As described, there was some variability in the quality of acknowledgement information provided on papers. In our analysis, we did not explore whether the differences in acknowledgement quality and completeness varied according to the nature of the paper (i.e. underpinning versus more applied research). A study of 43 UK clinical guidelines (and associated Health Technology Assessments) related to cancer demonstrated that the number of funding sources acknowledged in papers varied with the 'basicness' of the publications: "*the more clinical papers have fewer (funding) sources and the more basic papers have more*"<sup>14</sup>.



1  
2  
3  
4  
5 An interesting direction for future research work on clinical guidelines would be to  
6 investigate whether the high proportion of cited publications with at least one UK  
7 author in UK clinical guidelines could be the result of a specific funding strategy.  
8 That is, some research could be being funded to help create evidence for the  
9 development of clinical guidelines. This specific funding strategy might explain  
10 partially why UK-authored publications are over-cited in UK guidelines, relative to  
11 the share of publications.  
12  
13  
14  
15  
16  
17  
18  
19

20 The advice given to funding recipients by UK funders regarding how they should  
21 be acknowledged in publications, and the extent to which these requirements  
22 have been enforced, has varied significantly over the last two decades. While  
23 most funders have included a requirement for acknowledgement in their terms  
24 and conditions of award, it has only been since 2008 that there has been  
25 published guidance about a standard format<sup>23</sup>. This may explain why industry is  
26 fairly highly cited across both guidelines as part of a researcher's more stringent  
27 contractual obligations. However, it is worth noting that the extent to which  
28 researchers are following the standard format is unknown. Furthermore, the  
29 reality remains that, given the incremental nature of much research, it is not easy  
30 to precisely attribute a publication to its source of funding.  
31  
32  
33  
34  
35  
36  
37  
38  
39  
40  
41  
42  
43

44 One broader question is how to ensure that research information accessible is  
45 required to avoid spending funds on research that either cannot be used or may  
46 be duplication<sup>24</sup>.  
47  
48  
49  
50  
51

## 52 **Temporal issues**

53 We did find a correlation between the publication of the clinical guidelines and the  
54 dates of the papers cited within it. These results corroborate earlier research<sup>14</sup>.  
55  
56  
57  
58  
59  
60

1  
2  
3 Other bibliometric studies on UK clinical guidelines also found that a significant  
4 share of publications cited are published within 10 years before the release of  
5 these guidelines<sup>25, 26</sup>.  
6  
7

8  
9  
10 Therefore, this finding was not unexpected, since clinical guidelines should be  
11 based on new evidence, although on occasion the newest evidence may not be  
12 the best. However, it would be interesting to investigate whether the most recent  
13 publications cited are the outcome of research specifically funded for to support  
14 the development of a clinical guideline, thus potentially explaining the peak in  
15 publications cited in the two guidelines a few years before their release.  
16  
17  
18  
19  
20

### 21 22 **National contributions**

23  
24 The UK's contribution is high in both guidelines, since its world share in medical  
25 research measured by its share in the total number of publications published in  
26 the field amounted to approximately 8.6% in 2006<sup>27</sup>. This high proportion of  
27 papers linked to UK-based authors echoes the finding of previous studies.  
28  
29

30  
31 Interestingly, our analysis – where around a third of papers 35% of papers are  
32 linked to UK-based authors - reveals a higher proportion than we have seen in  
33 other analyses.  
34  
35  
36  
37  
38  
39  
40

### 41 42 **Conclusions and recommendations**

43  
44 Having greater access to the work cited on clinical guidelines would present new  
45 opportunities for funders and the research community alike to better understand  
46 some of the mechanisms that take research from the bed to the bedside. While  
47 this would be but one tool in the research impact evaluator's toolkit, it would be  
48 one that could be relatively easy to harness if both access and acknowledgements  
49 were improved. As described, work is underway between the UK NICE and the  
50 NCBI, and in the future, it is envisioned that other guideline providers will make  
51  
52  
53  
54  
55  
56  
57  
58  
59  
60

1  
2  
3 their content available in much more structured and accessible formats to permit  
4 analyses of this nature.  
5  
6  
7

8  
9 However, to bring clarity to the tracking of research inputs through to published  
10 output, the age old problem of ensuring accurate and complete acknowledgement  
11 information on peer-reviewed published work needs to be addressed. This  
12 requires a change in the culture of how researchers use acknowledgements and  
13 greater liaison with publishers and information providers who could do much to  
14 enhance the quality and completeness of funding data as a paper is submitted for  
15 publication. Clarity and perhaps demarcation between the requirements of an  
16 'acknowledgement' section on a paper and description of the 'funding' that has  
17 supported the work would seem an easy step to help remedy this<sup>28</sup>. This is  
18 particularly pertinent as information providers such as Thomson Reuters and  
19 Elsevier are now developing complex reporting and analytical tools that provide  
20 an ability to scrutinise the characteristics of published work – including who is  
21 described as funding the work - in new and exciting ways.  
22  
23  
24  
25  
26  
27  
28  
29  
30  
31  
32  
33  
34  
35

36 Moves to address the definition of an 'acknowledgement' may also help to  
37 address the issue of 'over-authorship' and author inflation that has been seen in  
38 recent years. This is thought to be fuelled in part by the drive towards impact  
39 assessment through national research allocation formulae; such as, the UK  
40 Research Assessment Exercise<sup>29</sup>. Some contributors listed as 'authors' might be  
41 more appropriately 'thanked'. Many journals now contain a section that asks for  
42 a description of 'contributions' – these often do not contain all those listed in the  
43 author list so there may be a place for a more defined 'acknowledgement as  
44 thanks' section.  
45  
46  
47  
48  
49  
50  
51  
52  
53  
54

55 Funders should also ensure clarity around their requirements for a 'funding  
56 acknowledgement'. Complexities arise for example, when research takes place in  
57  
58  
59  
60

1  
2  
3 buildings funded by a specific donor or when a specific piece of research uses a  
4 piece of equipment funded by a specific donor. And for how long after funding  
5 has been received by a researcher should they continue to provide a funding  
6 acknowledgement?  
7  
8  
9

10  
11  
12 We found that there is great potential for national and international guidelines to  
13 be used as sources of information on the impact of research on practice; the  
14 challenge is to be able to harness that information in an efficient way – so that  
15 we are able to use this information to feed into future research strategy and  
16 thereby make the research cycle more effective.  
17  
18  
19  
20  
21  
22  
23  
24  
25  
26  
27  
28  
29  
30  
31  
32  
33  
34  
35  
36  
37  
38  
39  
40  
41  
42  
43  
44  
45  
46  
47  
48  
49  
50  
51  
52  
53  
54  
55  
56  
57  
58  
59  
60

## 8. Acknowledgements

The authors are employed at the Medical Research Council, Wellcome Trust and [National Institute of Health Research, Department of Health](#).

We thank Centre for Science and Technology Studies (CWTS) [and At Leiden University](#) (Netherlands) for bibliometric analysis.

## 9. References

- <sup>1</sup> Robert Evans, Inna Kotchetkova, Susanne Langer. Just around the corner: rhetorics of progress and promise in genetic research. *Public Understanding of Science*. January 2009 18: 43-59.
- <sup>2</sup> Increasing the economic impact of Research Councils. Peter Warry for DTI. 2006
- <sup>3</sup> House of Commons Health Committee. 'The Use of New Medical Technologies within the NHS: Fifth Report of Session 2004-05.' Vol. 1. April 2005. [Available at: [http://www.parliament.the-stationeryoffice.co.uk/pa/cm200405/cmselect/cmhealth/39\\_8/398i.pdf](http://www.parliament.the-stationeryoffice.co.uk/pa/cm200405/cmselect/cmhealth/39_8/398i.pdf) ]
- <sup>4</sup> Government response to the Health Committee's report on the use of new medical technologies within the NHS. [Available at: [www.dh.gov.uk/PublicationsAndStatistics/Publications/PublicationsPolicyAndGuidance/PublicationsPolicyAndGuidanceArticle/fs/en?CONTENT\\_ID=4120880&chk=PtJqE5](http://www.dh.gov.uk/PublicationsAndStatistics/Publications/PublicationsPolicyAndGuidance/PublicationsPolicyAndGuidanceArticle/fs/en?CONTENT_ID=4120880&chk=PtJqE5)]
- <sup>5</sup> Sir David Cooksey. 'A Review of Health Research Funding'. 2006. [Available at: [www.hm-treasury.gov.uk/independent\\_reviews/cooksey\\_review/cookseyreview\\_index.cfm](http://www.hm-treasury.gov.uk/independent_reviews/cooksey_review/cookseyreview_index.cfm)]
- <sup>6</sup> Sir Derek Wanless. 'Securing our Future Health: Taking a Long-Term View.' April 2002. [Available at: [http://www.hm-treasury.gov.uk/consult\\_wanless\\_final.htm](http://www.hm-treasury.gov.uk/consult_wanless_final.htm)]
- <sup>7</sup> Healthcare Industries Task Force. 'Better health through partnership: a programme for action. Final report.' November 2004. [Available at: [www.advisorybodies.dh.gov.uk/hitf](http://www.advisorybodies.dh.gov.uk/hitf)]
- <sup>8</sup> National Institutes of Health, FY 2000 Research Program Outcomes Assessment Material. US Department of Health and Human Services. Bethesda, Maryland: National Institutes of Health, 2000.
- <sup>9</sup> Smith, R., Measuring the social impact of research. *British Medical Journal*, 323, 2001, 528.
- <sup>10</sup> World Health Organization, National Health Research Systems – Report of an International Workshop. Geneva: World Health Organization, 2002.

- 
- 1  
2  
3  
4  
5  
6  
7  
8  
9  
10  
11  
12  
13  
14  
15  
16  
17  
18  
19  
20  
21  
22  
23  
24  
25  
26  
27  
28  
29  
30  
31  
32  
33  
34  
35  
36  
37  
38  
39  
40  
41  
42  
43  
44  
45  
46  
47  
48  
49  
50  
51  
52  
53  
54  
55  
56  
57  
58  
59  
60
- <sup>11</sup> Grant, J., S Hanney and M Buxton, Academic medicine: time for reinvention. Research needs researching (Letter). *British Medical Journal*, 328, 2004 (3 January), 48.
- <sup>12</sup> More information can be found at [<http://www.nice.org.uk/aboutnice/>] (accessed on Dec 14, 2010)
- <sup>13</sup> G Lewison and R Sullivan. The impact of cancer research: how publications influence UK cancer clinical guidelines. *British Journal of Cancer* (2008) 98, 1944–1950.
- <sup>14</sup> J Kryworuchko, D Stacey, N Bai and ID Graham. Twelve years of clinical practice guideline development, dissemination and evaluation in Canada (1994 to 2005). *Implementation Science* 2009, 4:49.
- <sup>15</sup> <http://guidance.nice.org.uk/CG12>
- <sup>16</sup> <http://guidance.nice.org.uk/CG42>
- <sup>17</sup> E Hassan, H Ridsdale, J Grant, SE Kirk. Funding and performance on clinical guidelines: The cases of dementia and chronic obstructive pulmonary disease. Documented Briefing DB-597. April 2010.
- <sup>18</sup> Web of Science - [[http://apps.isiknowledge.com/UA\\_GeneralSearch\\_input.do?product=UA&search\\_mode=GeneralSearch&SID=N2bc@1PAg2BOeGMbngf&preferencesSaved=](http://apps.isiknowledge.com/UA_GeneralSearch_input.do?product=UA&search_mode=GeneralSearch&SID=N2bc@1PAg2BOeGMbngf&preferencesSaved=)]. Accessed December 2010.
- <sup>19</sup> Grant, J., Cottrell, R., Cluzeau, F., Fawcett, G. (2000), "Evaluating 'payback' on biomedical research from papers cited in clinical guidelines: applied bibliometric study", *BMJ*, Vol. 320 No.7242, pp.1107-11.
- <sup>20</sup> Dawson, G., Lucocq, B., Cottrell, R., et al (1998) Mapping the landscape. National Biomedical Research Outputs 1988–95. London: WellcomeTrust.
- <sup>21</sup> Webster BM, Lewison G, Rowlands I. Mapping the Landscape II: Biomedical Research in the UK, 1989–2002 2003. Department of Information Science, The City University.
- <sup>22</sup> Adams, J., Gurney, K & Marshall, S (2007). Profiling citation impact: a new methodology, *Scientometrics*, 72, 325-344.
- <sup>23</sup> Acknowledgement of Funders in Scholarly Journal Articles: Guidance for UK Research Funders, Authors and Publishers. 2008. Research Information Network. Accessible at [<http://www.rin.ac.uk/our-work/research-funding-policy-and-guidance/acknowledgement-funders-journal-articles>] on Dec 21, 2010.
- <sup>24</sup> Chalmers, I. & Glasziou, P. (2009) Avoidable waste in the production and reporting of research evidence *The Lancet*, 374, 9683: 86-89.
- <sup>25</sup> Grant et al., 2000
- <sup>26</sup> Buxton et al., 2009
- <sup>27</sup> Hassan, 2009

1  
2  
3  
4  
5  
6  
7  
8  
9  
10  
11  
12  
13  
14  
15  
16  
17  
18  
19  
20  
21  
22  
23  
24  
25  
26  
27  
28  
29  
30  
31  
32  
33  
34  
35  
36  
37  
38  
39  
40  
41  
42  
43  
44  
45  
46  
47  
48  
49  
50  
51  
52  
53  
54  
55  
56  
57  
58  
59  
60

---

<sup>28</sup> Giles, C.L & Council, I.G. (2004) Who gets acknowledged: Measuring scientific contributions through automatic acknowledgment indexing PNAS, 101(51): 17599 - 17604.

<sup>29</sup> Walker , C. G. et al (2010) Authors' opinions on publication in relation to annual performance assessment. BMC Medical Education 2010, 10 (doi:10.1186/1472-6920-10-21).

### **Contributorship**

All authors (DK, LA, KD, BS and IV) contributed extensively to all parts of this paper and commented on the manuscript at all stages. All authors were involved in the design of the study with some guidance on direction and feasibility from RAND Europe. All of the authors discussed the interpretation of the results of the study, and agreed the outline content for this publication. DK wrote the initial draft of the paper which was then reviewed and further shaped by all of the authors. BS prepared the final version of the paper and related information for submission for publication.

Peer review only

1  
2  
3  
4  
5  
6  
7  
8  
9  
10  
11  
12  
13  
14  
15  
16  
17  
18  
19  
20  
21  
22  
23  
24  
25  
26  
27  
28  
29  
30  
31  
32  
33  
34  
35  
36  
37  
38  
39  
40  
41  
42  
43  
44  
45  
46  
47  
48  
49  
50  
51  
52  
53  
54  
55  
56  
57  
58  
59  
60

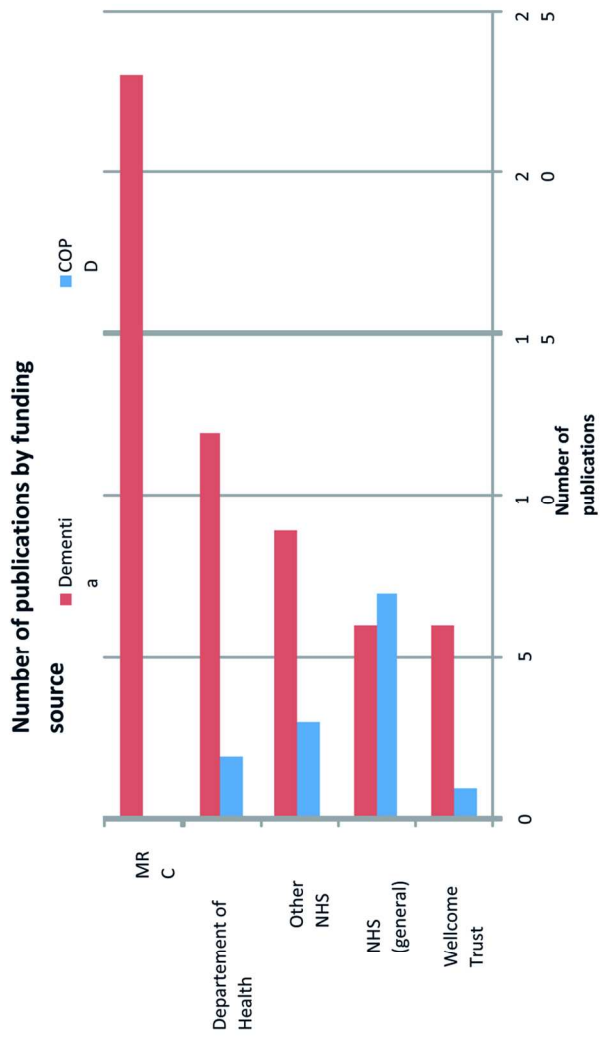

Numbers of publications by funding source.  
85x147mm (300 x 300 DPI)



1  
2  
3  
4  
5  
6  
7  
8  
9  
10  
11  
12  
13  
14  
15  
16  
17  
18  
19  
20  
21  
22  
23  
24  
25  
26  
27  
28  
29  
30  
31  
32  
33  
34  
35  
36  
37  
38  
39  
40  
41  
42  
43  
44  
45  
46  
47  
48  
49  
50  
51  
52  
53  
54  
55  
56  
57  
58  
59  
60

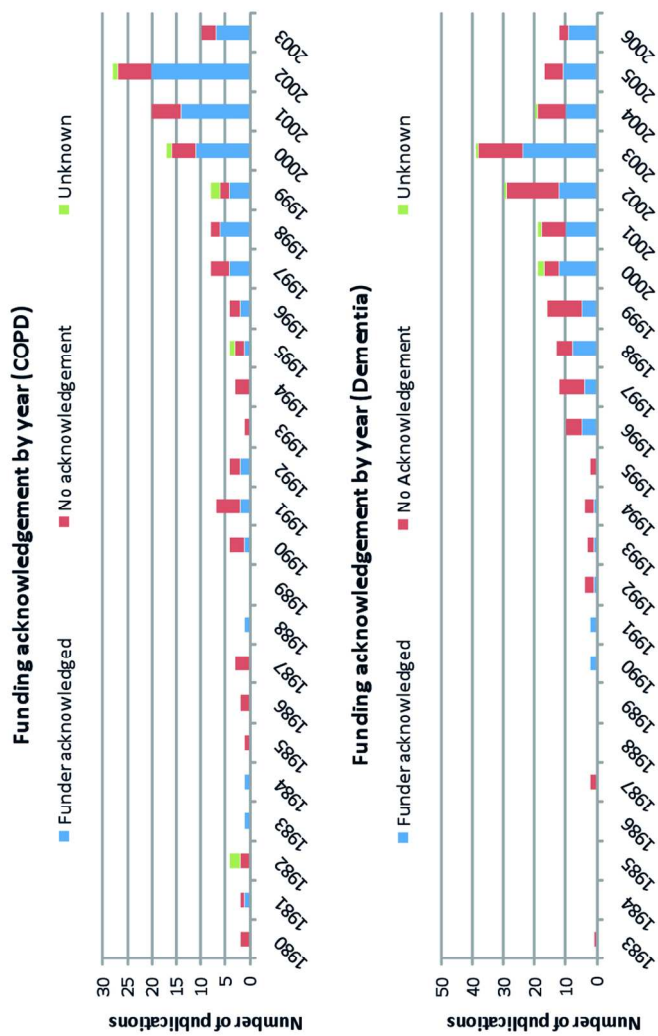

Funding acknowledgement by year.  
85x147mm (300 x 300 DPI)

1  
2  
3  
4  
5  
6  
7  
8  
9  
10  
11  
12  
13  
14  
15  
16  
17  
18  
19  
20  
21  
22  
23  
24  
25  
26  
27  
28  
29  
30  
31  
32  
33  
34  
35  
36  
37  
38  
39  
40  
41  
42  
43  
44  
45  
46  
47  
48  
49  
50  
51  
52  
53  
54  
55  
56  
57  
58  
59  
60

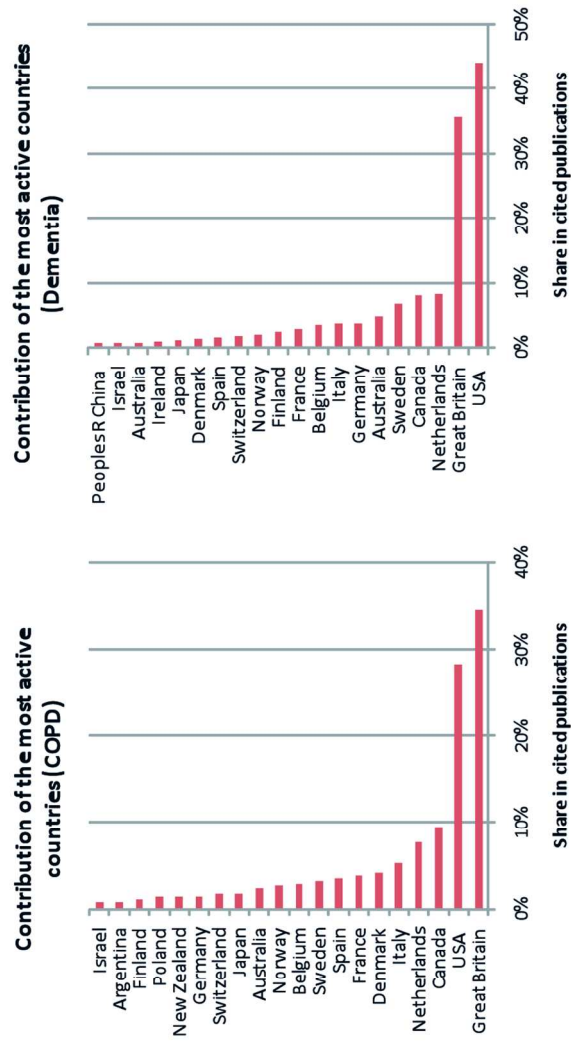

Contribution of the most active countries.  
85x147mm (300 x 300 DPI)

1  
2  
3  
4  
5  
6  
7  
8  
9  
10  
11  
12  
13  
14  
15  
16  
17  
18  
19  
20  
21  
22  
23  
24  
25  
26  
27  
28  
29  
30  
31  
32  
33  
34  
35  
36  
37  
38  
39  
40  
41  
42  
43  
44  
45  
46  
47  
48  
49  
50  
51  
52  
53  
54  
55  
56  
57  
58  
59  
60

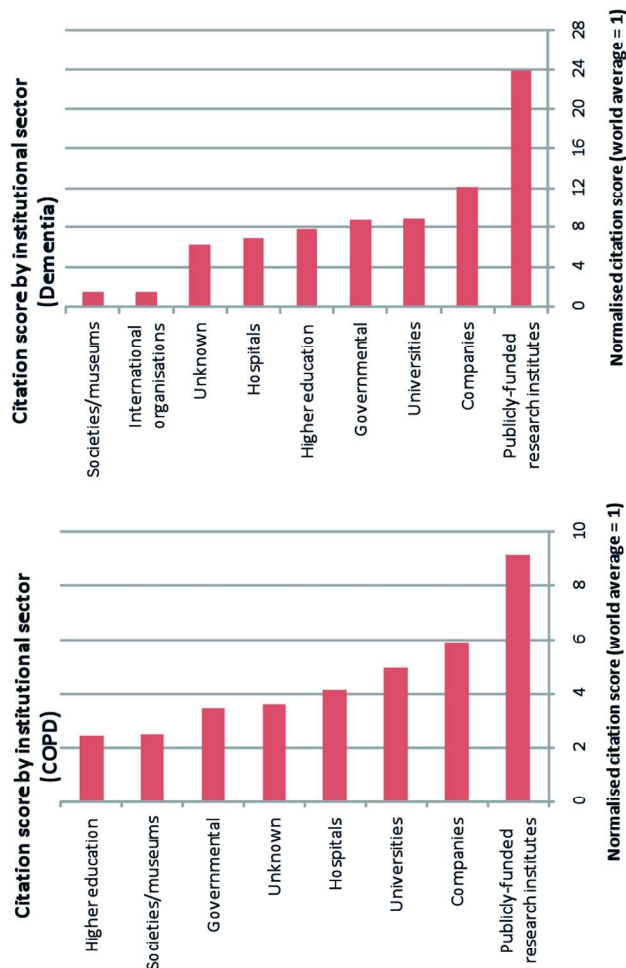

Citation score by institutional sector  
85x147mm (300 x 300 DPI)

# Please wait...

If this message is not eventually replaced by the proper contents of the document, your PDF viewer may not be able to display this type of document.

You can upgrade to the latest version of Adobe Reader for Windows®, Mac, or Linux® by visiting <http://www.adobe.com/products/acrobat/readstep2.html>.

For more assistance with Adobe Reader visit <http://www.adobe.com/support/products/acrreader.html>.

Windows is either a registered trademark or a trademark of Microsoft Corporation in the United States and/or other countries. Mac is a trademark of Apple Inc., registered in the United States and other countries. Linux is the registered trademark of Linus Torvalds in the U.S. and other countries.

# Please wait...

If this message is not eventually replaced by the proper contents of the document, your PDF viewer may not be able to display this type of document.

You can upgrade to the latest version of Adobe Reader for Windows®, Mac, or Linux® by visiting [http://www.adobe.com/go/reader\\_download](http://www.adobe.com/go/reader_download).

For more assistance with Adobe Reader visit <http://www.adobe.com/go/acrreader>.

Windows is either a registered trademark or a trademark of Microsoft Corporation in the United States and/or other countries. Mac is a trademark of Apple Inc., registered in the United States and other countries. Linux is the registered trademark of Linus Torvalds in the U.S. and other countries.

# Please wait...

If this message is not eventually replaced by the proper contents of the document, your PDF viewer may not be able to display this type of document.

You can upgrade to the latest version of Adobe Reader for Windows®, Mac, or Linux® by visiting [http://www.adobe.com/go/reader\\_download](http://www.adobe.com/go/reader_download).

For more assistance with Adobe Reader visit <http://www.adobe.com/go/acrreader>.

Windows is either a registered trademark or a trademark of Microsoft Corporation in the United States and/or other countries. Mac is a trademark of Apple Inc., registered in the United States and other countries. Linux is the registered trademark of Linus Torvalds in the U.S. and other countries.

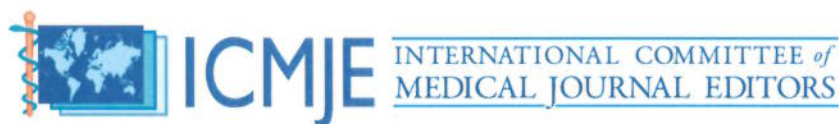

## ICMJE Form for Disclosure of Potential Conflicts of Interest

### Instructions

**The purpose of this form is to provide readers of your manuscript with information about your other interests that could influence how they receive and understand your work. The form is designed to be completed electronically and stored electronically. It contains programming that allows appropriate data display. Each author should submit a separate form and is responsible for the accuracy and completeness of the submitted information. The form is in four parts.**

#### 1. Identifying information.

Enter your full name. If you are NOT the corresponding author please check the box "no" and a space to enter the name of the corresponding author in the space that appears. Provide the requested manuscript information. Double-check the manuscript number and enter it.

#### 2. The work under consideration for publication.

This section asks for information about the work that you have submitted for publication. The time frame for this reporting is that of the work itself, from the initial conception and planning to the present. The requested information is about resources that you received, either directly or indirectly (via your institution), to enable you to complete the work. Checking "No" means that you did the work without receiving any financial support from any third party -- that is, the work was supported by funds from the same institution that pays your salary and that institution did not receive third-party funds with which to pay you. If you or your institution received funds from a third party to support the work, such as a government granting agency, charitable foundation or commercial sponsor, check "Yes". Then complete the appropriate boxes to indicate the type of support and whether the payment went to you, or to your institution, or both.

#### 3. Relevant financial activities outside the submitted work.

This section asks about your financial relationships with entities in the bio-medical arena that could be perceived to influence, or that give the appearance of potentially influencing, what you wrote in the submitted work. You should disclose interactions with ANY entity that could be considered broadly relevant to the work. For example, if your article is about testing an epidermal growth factor receptor (EGFR) antagonist in lung cancer, you should report all associations with entities pursuing diagnostic or therapeutic strategies in cancer in general, not just in the area of EGFR or lung cancer.

Report all sources of revenue paid (or promised to be paid) directly to you or your institution on your behalf over the 36 months prior to submission of the work. This should include all monies from sources with relevance to the submitted work, not just monies from the entity that sponsored the research. Please note that your interactions with the work's sponsor that are outside the submitted work should also be listed here. If there is any question, it is usually better to disclose a relationship than not to do so.

For grants you have received for work outside the submitted work, you should disclose support ONLY from entities that could be perceived to be affected financially by the published work, such as drug companies, or foundations supported by entities that could be perceived to have a financial stake in the outcome. Public funding sources, such as government agencies, charitable foundations or academic institutions, need not be disclosed. For example, if a government agency sponsored a study in which you have been involved and drugs were provided by a pharmaceutical company, you need only list the pharmaceutical company.

#### 4. Other relationships.

Use this section to report other relationships or activities that readers could perceive to have influenced, or that give the appearance of potentially influencing, what you wrote in the submitted work.

1  
2  
3  
4 London , WC2B 4AN

5  
6 Phone: +44 (0)20 7395 2208

7  
8 Email

9  
10 [beverley.sherbon@headoffice.mrc.ac.uk](mailto:beverley.sherbon@headoffice.mrc.ac.uk) (this email address can be published)

11  
12  
13  
14 Reprints are not available from the authors.

15  
16  
17  
18 Source(s) of support: The authors are employed, or supported by, the Medical  
19  
20 Research Council, National Institute of Health Research and Wellcome Trust.

21  
22  
23  
24 Word count (text only - excluding abstract, acknowledgments, figure legends, and  
25  
26 references): 3208

27  
28 Word count for the Abstract: 282

29  
30 Number of figures and tables: 4

31  
32  
33  
34 The Corresponding Author has the right to grant on behalf of all authors and does  
35  
36 grant on behalf of all authors, a non-exclusive licence on a worldwide basis to the  
37  
38 BMJ Publishing Group Ltd and its licensees, to permit this article (if accepted) to  
39  
40 be published in BMJ editions and any other BMJPG products and to exploit all  
41  
42 subsidiary rights, as set out in our licence  
43  
44  
45 (<http://resources.bmj.com/bmj/authors/checklists-forms/licence-for-publication>)  
46  
47  
48  
49  
50  
51  
52  
53  
54  
55  
56  
57  
58  
59  
60



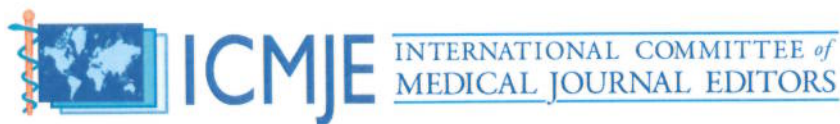

## ICMJE Form for Disclosure of Potential Conflicts of Interest

### Section 1. Identifying Information

1. Given Name (First Name) **BEVERLEY**      2. Surname (Last Name) **SHERBON**      3. Effective Date (07-August-2008) **21 - NOV - 2011**

4. Are you the corresponding author?     Yes     No

5. Manuscript Title  
**TRACKING THE IMPACT OF RESEARCH ON POLICY & PRACTICE : THE USE OF CLINICAL GUIDELINES IN RESEARCH EVALUATION.**

6. Manuscript Identifying Number (if you know it)

### Section 2. The Work Under Consideration for Publication

Did you or your institution at any time receive payment or services from a third party for any aspect of the submitted work (including but not limited to grants, data monitoring board, study design, manuscript preparation, statistical analysis, etc...)?

Complete each row by checking "No" or providing the requested information. **If you have more than one relationship click the "Add" button to add a row. Excess rows can be removed by clicking the "X" button.**

| The Work Under Consideration for Publication                                                                                            |                                     |                          |                            |                |            |     |
|-----------------------------------------------------------------------------------------------------------------------------------------|-------------------------------------|--------------------------|----------------------------|----------------|------------|-----|
| Type                                                                                                                                    | No                                  | Money Paid to You        | Money to Your Institution* | Name of Entity | Comments** |     |
| 1. Grant                                                                                                                                | <input checked="" type="checkbox"/> | <input type="checkbox"/> | <input type="checkbox"/>   |                |            | X   |
|                                                                                                                                         |                                     |                          |                            |                |            | ADD |
| 2. Consulting fee or honorarium                                                                                                         | <input checked="" type="checkbox"/> | <input type="checkbox"/> | <input type="checkbox"/>   |                |            | X   |
|                                                                                                                                         |                                     |                          |                            |                |            | ADD |
| 3. Support for travel to meetings for the study or other purposes                                                                       | <input checked="" type="checkbox"/> | <input type="checkbox"/> | <input type="checkbox"/>   |                |            | X   |
|                                                                                                                                         |                                     |                          |                            |                |            | ADD |
| 4. Fees for participation in review activities such as data monitoring boards, statistical analysis, end point committees, and the like | <input checked="" type="checkbox"/> | <input type="checkbox"/> | <input type="checkbox"/>   |                |            | X   |
|                                                                                                                                         |                                     |                          |                            |                |            | ADD |
| 5. Payment for writing or reviewing the manuscript                                                                                      | <input checked="" type="checkbox"/> | <input type="checkbox"/> | <input type="checkbox"/>   |                |            | X   |
|                                                                                                                                         |                                     |                          |                            |                |            | ADD |
| 6. Provision of writing assistance, medicines, equipment, or administrative support                                                     | <input checked="" type="checkbox"/> | <input type="checkbox"/> | <input type="checkbox"/>   |                |            | X   |

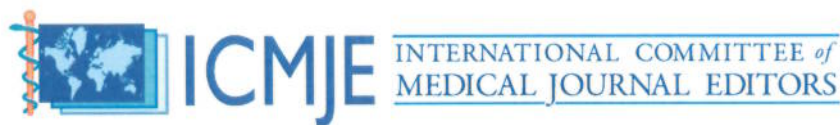

## ICMJE Form for Disclosure of Potential Conflicts of Interest

| The Work Under Consideration for Publication |                                     |                          |                            |                |            |     |
|----------------------------------------------|-------------------------------------|--------------------------|----------------------------|----------------|------------|-----|
| Type                                         | No                                  | Money Paid to You        | Money to Your Institution* | Name of Entity | Comments** |     |
| 7. Other                                     | <input checked="" type="checkbox"/> | <input type="checkbox"/> | <input type="checkbox"/>   |                |            | ADD |
|                                              |                                     |                          |                            |                |            | X   |
|                                              |                                     |                          |                            |                |            | ADD |

\* This means money that your institution received for your efforts on this study.

\*\* Use this section to provide any needed explanation.

### Section 3. Relevant financial activities outside the submitted work.

Place a check in the appropriate boxes in the table to indicate whether you have financial relationships (regardless of amount of compensation) with entities as described in the instructions. Use one line for each entity; add as many lines as you need by clicking the "Add +" box. You should report relationships that were present during the 36 months prior to submission.

Complete each row by checking "No" or providing the requested information. **If you have more than one relationship click the "Add" button to add a row. Excess rows can be removed by clicking the "X" button.**

| Relevant financial activities outside the submitted work      |                                     |                          |                            |        |          |     |
|---------------------------------------------------------------|-------------------------------------|--------------------------|----------------------------|--------|----------|-----|
| Type of Relationship (in alphabetical order)                  | No                                  | Money Paid to You        | Money to Your Institution* | Entity | Comments |     |
| 1. Board membership                                           | <input checked="" type="checkbox"/> | <input type="checkbox"/> | <input type="checkbox"/>   |        |          | X   |
|                                                               |                                     |                          |                            |        |          | ADD |
| 2. Consultancy                                                | <input checked="" type="checkbox"/> | <input type="checkbox"/> | <input type="checkbox"/>   |        |          | X   |
|                                                               |                                     |                          |                            |        |          | ADD |
| 3. Employment                                                 | <input checked="" type="checkbox"/> | <input type="checkbox"/> | <input type="checkbox"/>   |        |          | X   |
|                                                               |                                     |                          |                            |        |          | ADD |
| 4. Expert testimony                                           | <input checked="" type="checkbox"/> | <input type="checkbox"/> | <input type="checkbox"/>   |        |          | X   |
|                                                               |                                     |                          |                            |        |          | ADD |
| 5. Grants/grants pending                                      | <input checked="" type="checkbox"/> | <input type="checkbox"/> | <input type="checkbox"/>   |        |          | X   |
|                                                               |                                     |                          |                            |        |          | ADD |
| 6. Payment for lectures including service on speakers bureaus | <input checked="" type="checkbox"/> | <input type="checkbox"/> | <input type="checkbox"/>   |        |          | X   |
|                                                               |                                     |                          |                            |        |          | ADD |
| 7. Payment for manuscript preparation                         | <input checked="" type="checkbox"/> | <input type="checkbox"/> | <input type="checkbox"/>   |        |          | X   |

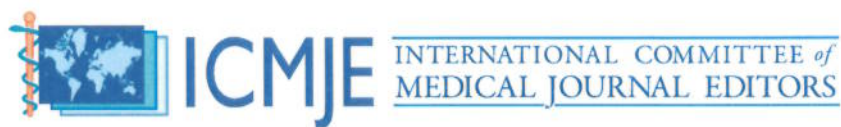

## ICMJE Form for Disclosure of Potential Conflicts of Interest

| Relevant financial activities outside the submitted work                    |                                     |                          |                            |        |          |     |
|-----------------------------------------------------------------------------|-------------------------------------|--------------------------|----------------------------|--------|----------|-----|
| Type of Relationship (in alphabetical order)                                | No                                  | Money Paid to You        | Money to Your Institution* | Entity | Comments |     |
| 8. Patents (planned, pending or issued)                                     | <input checked="" type="checkbox"/> | <input type="checkbox"/> | <input type="checkbox"/>   |        |          | ADD |
|                                                                             |                                     |                          |                            |        |          | X   |
|                                                                             |                                     |                          |                            |        |          | ADD |
| 9. Royalties                                                                | <input checked="" type="checkbox"/> | <input type="checkbox"/> | <input type="checkbox"/>   |        |          | X   |
|                                                                             |                                     |                          |                            |        |          | ADD |
| 10. Payment for development of educational presentations                    | <input checked="" type="checkbox"/> | <input type="checkbox"/> | <input type="checkbox"/>   |        |          | X   |
|                                                                             |                                     |                          |                            |        |          | ADD |
| 11. Stock/stock options                                                     | <input checked="" type="checkbox"/> | <input type="checkbox"/> | <input type="checkbox"/>   |        |          | X   |
|                                                                             |                                     |                          |                            |        |          | ADD |
| 12. Travel/accommodations/meeting expenses unrelated to activities listed** | <input checked="" type="checkbox"/> | <input type="checkbox"/> | <input type="checkbox"/>   |        |          | X   |
|                                                                             |                                     |                          |                            |        |          | ADD |
| 13. Other (err on the side of full disclosure)                              | <input checked="" type="checkbox"/> | <input type="checkbox"/> | <input type="checkbox"/>   |        |          | X   |
|                                                                             |                                     |                          |                            |        |          | ADD |

\* This means money that your institution received for your efforts.

\*\* For example, if you report a consultancy above there is no need to report travel related to that consultancy on this line.

### Section 4. Other relationships

Are there other relationships or activities that readers could perceive to have influenced, or that give the appearance of potentially influencing, what you wrote in the submitted work?

- No other relationships/conditions/circumstances that present a potential conflict of interest
- Yes, the following relationships/conditions/circumstances are present (explain below):

At the time of manuscript acceptance, journals will ask authors to confirm and, if necessary, update their disclosure statements. On occasion, journals may ask authors to disclose further information about reported relationships.

Hide All Table Rows Checked 'No'      SAVE

1  
2  
3  
4  
5  
6  
7  
8  
9  
10  
11  
12  
13  
14  
15  
16  
17  
18  
19  
20  
21  
22  
23  
24  
25  
26  
27  
28  
29  
30  
31  
32  
33  
34  
35  
36  
37  
38  
39  
40  
41  
42  
43  
44  
45  
46  
47  
48  
49  
50  
51  
52  
53  
54  
55  
56  
57  
58  
59  
60

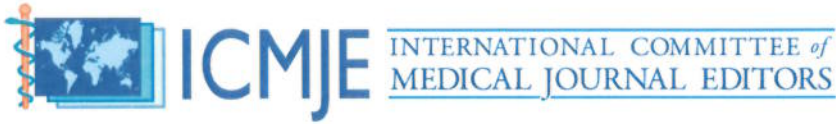

## ICMJE Form for Disclosure of Potential Conflicts of Interest

---

### Evaluation and Feedback

Please visit <http://www.icmje.org/cgi-bin/feedback> to provide feedback on your experience with completing this form.

# Please wait...

If this message is not eventually replaced by the proper contents of the document, your PDF viewer may not be able to display this type of document.

You can upgrade to the latest version of Adobe Reader for Windows®, Mac, or Linux® by visiting [http://www.adobe.com/go/reader\\_download](http://www.adobe.com/go/reader_download).

For more assistance with Adobe Reader visit <http://www.adobe.com/go/acrreader>.

Windows is either a registered trademark or a trademark of Microsoft Corporation in the United States and/or other countries. Mac is a trademark of Apple Inc., registered in the United States and other countries. Linux is the registered trademark of Linus Torvalds in the U.S. and other countries.



**Tracking the impact of research on policy and practice:  
investigating the feasibility of using citations in clinical  
guidelines for research evaluation.**

|                                 |                                                                                                                                                                                                                                                                                                                                               |
|---------------------------------|-----------------------------------------------------------------------------------------------------------------------------------------------------------------------------------------------------------------------------------------------------------------------------------------------------------------------------------------------|
| Journal:                        | <i>BMJ Open</i>                                                                                                                                                                                                                                                                                                                               |
| Manuscript ID:                  | bmjopen-2012-000897.R1                                                                                                                                                                                                                                                                                                                        |
| Article Type:                   | Research                                                                                                                                                                                                                                                                                                                                      |
| Date Submitted by the Author:   | 02-Mar-2012                                                                                                                                                                                                                                                                                                                                   |
| Complete List of Authors:       | Kryl, David; Department of Health, National Institute of Health Research<br>Allen, Liz; Wellcome Trust, Strategic Planning & Policy Unit<br>Dolby, Kevin; Wellcome Trust, Strategic Planning & Policy Unit<br>Sherbon, Beverley; Medical Research Council, Strategy Directorate<br>Viney, Ian; Medical Research Council, Strategy Directorate |
| <b>Primary Subject Heading</b>: | Medical management                                                                                                                                                                                                                                                                                                                            |
| Secondary Subject Heading:      | Communication, Health informatics, Evidence based practice, Health policy                                                                                                                                                                                                                                                                     |
| Keywords:                       | GENERAL MEDICINE (see Internal Medicine), Health informatics <<br>BIOTECHNOLOGY & BIOINFORMATICS, Protocols & guidelines < HEALTH<br>SERVICES ADMINISTRATION & MANAGEMENT                                                                                                                                                                     |
|                                 |                                                                                                                                                                                                                                                                                                                                               |

SCHOLARONE™  
Manuscripts

## 1. Title page

Article title: Tracking the impact of research on policy and practice: investigating the feasibility of using citations in clinical guidelines for research evaluation.

Authors' names and institutional affiliations (Names, addresses, and positions of all authors plus email address for corresponding author):

| <b>Author name</b> | <b>Position</b>               | <b>Department</b>                     | <b>Organisation</b>                                                            |
|--------------------|-------------------------------|---------------------------------------|--------------------------------------------------------------------------------|
| David Kryl         | Head of Business Intelligence | National Institute of Health Research | Department of Health<br>79 Whitehall<br>London SW1A 2NS                        |
| Liz Allen          | Senior Evaluation Adviser     | Strategic Planning & Policy Unit      | Wellcome Trust<br>Gibbs Building<br>215 Euston Road<br>London NW1 2BE          |
| Kevin Dolby        | Evaluation Adviser            | Strategic Planning & Policy Unit      | Wellcome Trust                                                                 |
| Beverley Sherbon   | Evaluation Programme Manager  | Strategy Group                        | Medical Research Council<br>14th Floor<br>One Kemble Street<br>London WC2B 4AN |
| Ian Viney          | Head of Evaluation            | Strategy Group                        | Medical Research Council                                                       |

Disclaimers: This paper reflects the opinions of the authors and does not necessarily reflect the opinions of their respective organisations.

Contact information for corresponding author:

Beverley Sherbon

Medical Research Council

1 Kemble Street

1  
2  
3 London , WC2B 4AN

4  
5 Phone: +44 (0)20 7395 2208

6  
7 Email

8  
9 beverley.sherbon@headoffice.mrc.ac.uk (this email address can be published)

10  
11  
12 Reprints are not available from the authors.

13  
14  
15 Source(s) of support: The authors are employed, or supported by, the Medical  
16  
17 Research Council, the National Institute of Health Research and the Wellcome  
18  
19 Trust.  
20

21  
22  
23  
24 Word count (text only - excluding abstract, acknowledgments, figure legends, and  
25  
26 references): 3416

27  
28 Word count for the Abstract: 289

29  
30 Number of figures and tables: 4  
31  
32

33  
34 The Corresponding Author has the right to grant on behalf of all authors and does  
35  
36 grant on behalf of all authors, a non-exclusive licence on a worldwide basis to the  
37  
38 BMJ Publishing Group Ltd and its licensees, to permit this article (if accepted) to  
39  
40 be published in BMJ editions and any other BMJPG products and to exploit all  
41  
42 subsidiary rights, as set out in our licence

43  
44 (<http://resources.bmj.com/bmj/authors/checklists-forms/licence-for-publication>)  
45  
46  
47  
48  
49  
50  
51  
52  
53  
54  
55  
56  
57  
58  
59  
60



## ***2. Conflicts of Interest Notification Page***

All authors have completed the Unified Competing Interest form at [www.icmje.org/coi\\_disclosure.pdf](http://www.icmje.org/coi_disclosure.pdf) (available on request from the corresponding author) and declare that (1) DK also holds the position of Research Leader at RAND Europe; and (2) LA is a member of the ORCID Board of Directors; and (3) DK, LA, KD, BS and IV have no non-financial interests that may be relevant to the submitted work.

### **3. Abstract**

#### **Objectives**

***To investigate the feasibility of using research papers cited in clinical guidelines as a way to track the impact of particular funding streams or sources.***

#### **Setting**

***In recent years, medical research funders have made efforts to enhance the understanding of the impact of their funded research, to provide evidence of the 'value' of investments in particular areas of research. One of the most challenging areas of research evaluation is around impact of policy and practice.***

***In the UK, the National Institute of Health and Clinical Excellence (NICE) provide clinical guidelines, which bring together current high quality evidence on the diagnosis and treatment of clinical problems. Research referenced in these guidelines is an indication that of its potential to have real impact on health policy and practice.***

#### **Design**

***This study is based on analysis of the authorship and funding attribution of research cited in two NICE clinical guidelines; dementia and chronic obstructive pulmonary disease (COPD).***

#### **Results**

***Analysis identified that around a third of papers cited in the***

1  
2  
3 **two NICE guidelines had at least one author based in the UK.**  
4 **In both cases about half of these UK attributed papers**  
5 **contained acknowledgements which allowed the source of**  
6 **funding for the research to be identified.**  
7  
8  
9

10  
11  
12 **The research cited in these guidelines was found to have**  
13 **been supported by a diverse set of funders from different**  
14 **sectors. The study also investigated the contribution of**  
15 **research groups based in Universities, industry and the**  
16 **public sector.**  
17  
18  
19  
20  
21

### 22 23 24 **Conclusions**

25 **The study found that there is great potential for guidelines to**  
26 **be used as sources of information on the quality of the**  
27 **research used in their development, and that it is possible to**  
28 **track the source of the funding of the research. The challenge**  
29 **is in harnessing the relevant information to track this in an**  
30 **efficient way.**  
31  
32  
33  
34  
35  
36  
37  
38  
39  
40  
41  
42  
43  
44  
45  
46  
47  
48  
49  
50  
51  
52  
53  
54  
55  
56  
57  
58  
59  
60

#### 4. Introduction

Medical research has advanced rapidly in recent times in all areas from basic sciences (i.e. decoding the human genome) to the development of more precise diagnostic tools and novel treatments. At the same time, public interest in biomedical advances and the appetite for more effective treatments<sup>1</sup> are increasing in parallel. The demand for the results of biomedical research to lead to improvement in healthcare has never been higher<sup>2, 3, 4</sup>.

Across the research world, and particularly in the biosciences, there has been a drive to better demonstrate and understand the impacts of research, essentially so that funds can be allocated to maximum effect.<sup>1</sup> There remains a concern that the research community as a whole could be better at translating the findings of medical research into tangible health and healthcare benefits<sup>5, 6, 7</sup>. Thus, the need to better understand research impact and in particular the pathways to that impact is a key priority for research funders<sup>8, 9, 10, 11</sup>. However, determining the impact of research is challenging, particularly in basic and fundamental research where the time lag between original research and subsequent impacts on health can be long and the attribution difficult to track. In addition, perhaps one of the most challenging areas has been trying to understand the nature of the pathways to, and subsequent impact of research on policy and practice.

National and international clinical guidelines are intended to bring together the best and most current evidence about the prevention, diagnosis, prognosis and therapy of clinical problems. Clinical guidelines are a form of systematic review and, in the UK, focus on the defined medical needs of the National Health Service (NHS). It should be noted that clinical guidelines are not standards of care but are recommendations to the non-specialist or GP. In the UK, clinical guidelines are provided by the National Institute for Health and Clinical Excellence (NICE<sup>12</sup>) and, since 2005, these have had legal standing in the NHS in England and Wales.

1  
2  
3 As such the results of this particular study are potentially limited to the NHS,  
4 however, the methodology could possibly be applied to guidelines governed by  
5 other bodies. The guidelines exist to help standardise and improve patient care  
6 and can help to introduce cost-efficiencies to the delivery of healthcare. The  
7 guidelines are evidence-based and their formulation brings pieces of important  
8 and influential research together. For a funder, if research it has supported is  
9 referenced as part of the evidence supporting a national and/or international  
10 clinical guideline, then it is an indication that a piece of research is likely to be  
11 influencing policy and practice. Hence clinical guidelines are potentially an  
12 attractive resource to support impact tracking and assessment<sup>13, 14</sup>.  
13  
14  
15  
16  
17  
18  
19  
20  
21  
22  
23

24 For those engaged in evaluation, historically it has been difficult to extract  
25 information from a guideline in a way that helps support analysis of the  
26 references and funding sources: simply put, UK clinical guidelines are not  
27 designed to support the requirements of funders trying to track the impact of  
28 their support. However, work is underway at the National Centre for  
29 Biotechnology Information (NCBI, part of the National Library of Medicine, NIH),  
30 to digitise the content of major international clinical guidelines to encourage wider  
31 access to their content and enable greater ability to mine their content and allow  
32 automated links to individual cited research papers via databases such as  
33 PubMed.  
34  
35  
36  
37  
38  
39  
40  
41  
42  
43  
44  
45

46 In 2009, the UK Medical Research Council (MRC), the Wellcome Trust and the  
47 National Institute of Health Research (NIHR), who among them commit nearly  
48 £2bn annually to support biomedical and applied health research, commissioned a  
49 detailed analysis of the research cited on a small number of UK clinical guidelines  
50 to explore the potential of the information in broader research impact tracking.  
51  
52 The objectives of this research were threefold. First, this study explored the  
53 feasibility of *extracting* the funding source of the research papers cited on a  
54  
55  
56  
57  
58  
59  
60

1  
2  
3 guideline. Second, it identified *who funded* the research cited in the selected  
4 clinical guidelines. Third, it explored the extent to which there are shared  
5 characteristics of the publications cited in these guidelines.  
6  
7  
8  
9

10  
11 The then-current NICE guidelines for the management and treatment of two  
12 disease areas were selected: dementia (2006) and chronic obstructive pulmonary  
13 disease (2004)<sup>15, 16</sup>. These guidelines were of interest for the purposes of this  
14 analysis since (a) they had been available unchanged for several years, and (b)  
15 there was a likelihood that all three project sponsor funders would have funded  
16 some of the underlying research evidenced in the guidelines. The two guidelines  
17 were also in quite different clinical areas, so we wanted to see if there were  
18 differences in the process and/or adoption of research into practice. For each  
19 guideline, all cited research was examined to pick out its characteristics (e.g. age,  
20 bibliometric indicators) and identify any funding attributions.  
21  
22  
23  
24  
25  
26  
27  
28  
29  
30  
31  
32  
33  
34  
35  
36  
37  
38  
39  
40  
41  
42  
43  
44  
45  
46  
47  
48  
49  
50  
51  
52  
53  
54  
55  
56  
57  
58  
59  
60

## 5. Methods

### Data extraction

The first step was to extract a list of publications from each of the guidelines and export them into a Microsoft Excel spreadsheet. This was performed automatically using bespoke RAND Europe computer scripts, based on the PERL scripting language. Here we briefly describe the methodology, since a full description is available elsewhere<sup>17</sup>. A total of 744 references were extracted from the dementia guideline and 446 for the COPD guideline.

### Data cleaning

The extracted bibliographic references were cleaned and structured to permit analyses of funding source and paper performance indicators. Any references identified as non-academic or peer-reviewed publications (e.g. references to a website, grey literature), and all publications before 1980 were removed, since these could not be investigated using the Web of Science.

After extraction and initial cleaning, a total of 616 references were found for the dementia guideline (79.4% of the original 776 references) and 412 references for the COPD guideline (83.9% of the original 491 references).

### Data processing

For the funding analyses, the extracted publications were searched for in Web of Science<sup>18</sup> to find the institution and country affiliations of the authors listed. One aim was to identify the publications with at least one UK author on the assumption that this would facilitate further funding analysis. Another aim was to use all the extracted publications for further bibliometric analysis (see<sup>19</sup> for a similar methodology).

From the dementia guideline, 494 out of the 616 extracted publications

1  
2  
3 (80.1%) were found in the Web of Science. While from the COPD guideline, 335  
4 out of 412 publications were available (81.3%). Any publications not found in the  
5 Web of Science were processed individually through a search methodology  
6 utilising the publication libraries of RAND Europe and Cambridge University. All  
7 search processes were duplicated by a second researcher to eliminate errors.  
8  
9

10  
11  
12  
13  
14 This methodology used a simple search of both the RAND library by article title,  
15 using Google Scholar, and the Cambridge University online library and free access  
16 journals, through the Google search engine. If the author affiliation and country  
17 remained unidentified, then the RAND library was searched by journal, followed  
18 by browsing for the article using the reference data available. In addition, the title  
19 could be searched for by keyword within the journal. Finally, where possible,  
20 Cambridge University print holdings were searched to find any articles that were  
21 not accessible online.  
22  
23  
24  
25  
26  
27  
28  
29  
30

### 31 **Funder acknowledgement**

32  
33 Where publications had at least partial UK attribution, the funding source was  
34 searched for in the Research Outputs Database (ROD)<sup>20, 21</sup>. This is a database  
35 housed at the Wellcome Trust recording the funding sources for UK and Irish  
36 publications in the biomedical sciences for the period 1988–2001. Funding  
37 acknowledgements were found for around one-third of publications using this  
38 database. For the remaining publications, which fell outside of the appropriate  
39 date range or were not found in the ROD, the full text of the publication was  
40 found and funding acknowledgements recorded directly, where available.  
41  
42  
43  
44  
45  
46  
47  
48  
49

50  
51 Funding source references were then standardised and categorised by broad  
52 sector. UK funders acknowledged on cited papers were categorised into the  
53 following categories: industry, not-for-profit, hospital trust, government  
54  
55  
56  
57  
58  
59  
60



1  
2  
3 department, government agency (not controlled by ministries), local or regional  
4 authority, foundation, none given and unknown.  
5  
6  
7

### 8 **Bibliometric and paper characteristic analysis**

9  
10 Author affiliations and country locations were identified for 595 of the 616 (97%)  
11 dementia guideline publications and 402 of the 412 (98%) COPD guideline  
12 publications. These affiliated papers form the basis of the following descriptive  
13 and bibliometric analysis.  
14  
15  
16

17  
18  
19 The citation impact of the publications referenced in both clinical guidelines was  
20 analysed by sector using the concept of citation profiling. This is based on a  
21 normalising technique called ReBased Impact (RBI), which takes account of the  
22 field in which a paper appears and the date since its publication to effectively  
23 provide a proxy measure for the 'quality' of each paper. The world average RBI is  
24 1; the most highly cited articles have an RBI  $>8^{22}$   
25  
26  
27  
28  
29

30  
31 Whole counts were used throughout this analysis; if more than one funding  
32 source is cited in a publication, this was recorded as *one* publication for each  
33 funding source.  
34  
35  
36  
37  
38  
39  
40  
41  
42  
43  
44  
45  
46  
47  
48  
49  
50  
51  
52  
53  
54  
55  
56  
57  
58  
59  
60

## 6. Results

### **Attribution by funding organisation**

In a large proportion of cited papers, no funding acknowledgement was listed.

Nearly half (104 of the 228; 46%) of publications in the dementia guideline with a UK author did not acknowledge any funder. Funding information was available for 117 papers, with the full text of 7 papers inaccessible and, hence, missing the funding information. For the 148 publications in the COPD guideline with at least one UK author, 60 included no funding acknowledgement (41%). Funding information was available for 81 publications. The full text of 7 publications was not accessible and therefore no funding data was available.

Examination of the funding acknowledgements for the Medical Research Council (MRC), the Department of Health (England), the NHS and the Wellcome Trust revealed that these funders were overtly linked to only a small proportion of papers cited in the guidelines (see figure 1 – Numbers of publications by funding source).

### **Attributions by funding organisation over time**

To determine whether the practice of acknowledgement of funding has improved over time, funding acknowledgement was analysed by year of publication.

Although it appears that more recent publications have more complete funding acknowledgements than older ones, over the whole period, and for both guidelines, there was no clear statistical relationship between the age of publication and the presence or absence of a funding acknowledgement (see figure 2 – Funding acknowledgement by year).

The clinical guidelines, on the whole, cited recent research; the majority of research papers cited in these two UK clinical guidelines were published after

1  
2  
3 2000, that is, within five years of the release of these guidelines. Although the  
4 average duration between the publication date of papers cited and the publication  
5 date of the citing guideline was 5 years for dementia and 3 years for COPD.  
6  
7

### 8 9 10 **Attribution by funding sector**

11  
12  
13 Industry was not as prominent a funding source for publications cited in the  
14 dementia guideline, where acknowledgements were distributed across a range of  
15 funding sources across sectors. In the COPD guideline, industry was the most  
16 frequently linked funder after 'none given'.  
17  
18  
19

### 20 21 22 **Attribution by country**

23  
24  
25 Of the 616 publications extracted from the dementia guideline, 228 (37.2%) had  
26 at least one UK-based author; while from the COPD guideline, 148 publications  
27 (35.9%) had at least one UK-based author. Researchers based in the UK and US  
28 combined were linked to the majority of papers cited in both guidelines.  
29  
30  
31

32  
33  
34  
35  
36 Despite this dominance of the UK and USA-based researchers in the cited papers,  
37 many other countries contributed to these publications. Papers cited in the  
38 dementia and COPD guidelines were linked to authors from 37 and 36 countries,  
39 respectively (see figure 3 – Contribution of the most active countries).  
40  
41  
42

### 43 44 45 **Attribution by research sector**

46  
47 The three research funders use different means of disbursing their money.  
48 Funding includes grants to universities and hospitals, alongside direct support for  
49 intramural research. Publication analysis by associated institutions revealed that  
50 researchers with university addresses, followed by those with hospital addresses,  
51 were linked to the bulk of papers cited on both guidelines. More than 80% of  
52 publications cited in the two guidelines involved authors based at universities.  
53  
54  
55  
56  
57  
58  
59  
60

1  
2  
3 The scientific contribution from other types of publicly funded institutions, as well  
4  
5 as from non-profit institutions, was low.  
6  
7

8  
9 As described, nearly 20% of the publications cited in the COPD guideline involved  
10  
11 authors from industry - a slightly higher proportion than in the Dementia  
12  
13 guideline.  
14

### 15 16 17 **Citation quality**

18  
19 Clinical guideline drafting committees are obliged to base their recommendations  
20  
21 on the 'best' research available. The citation impact of the publications referenced  
22  
23 in both clinical guidelines was analysed by sector using the concept of citation  
24  
25 profiling.  
26  
27

28  
29 Overall papers cited across both guidelines had high RBIs. Papers linked to  
30  
31 universities, companies (industry) and publicly-funded research institutions were  
32  
33 particularly highly cited. At the time of the analysis, for the COPD guideline, cited  
34  
35 papers linked to publicly-funded research institutions had RBI > 8; for the  
36  
37 dementia guideline papers linked to universities, companies and publicly-funded  
38  
39 research institutions all had particularly impressive RBIs (see figure 4 – Citation  
40  
41 score by institutional sector).  
42  
43  
44  
45  
46  
47  
48  
49  
50  
51  
52  
53  
54  
55  
56  
57  
58  
59  
60

## 7. Discussion

### Funding attribution

Perhaps the greatest challenge in research impact assessment is dealing with attribution. Attribution of research outcomes and impacts to a specific funder is complex and, in many cases, improbable. This arises from most medical research receiving funding from multiple sources, involving a host of researchers (often across institutions) and being incremental such that considerable time elapses between original research and impact on health. The tide has turned on this issue and funding bodies are increasingly working together to identify where their funding has made a difference and contributed to an outcome or impact. Exclusively 'claiming' impact ignores the complexities and reality of scientific research and we are more interested in noting our contribution alongside others and learning from this.

Nevertheless, there is much we can do to help us better understand the connection between funding inputs and changes in medical practice. This research project was intended to flesh out some of the issues that we face in trying to link research funding to research output (i.e. research papers) and specific outcomes (clinical guidelines).

As described, there was some variability in the quality of acknowledgement information provided on papers. In our analysis, we did not explore whether the differences in acknowledgement quality and completeness varied according to the nature of the paper (i.e. underpinning versus more applied research). A study of 43 UK clinical guidelines (and associated Health Technology Assessments) related to cancer demonstrated that the number of funding sources acknowledged in papers varied with the 'basicness' of the publications: "*the more clinical papers have fewer (funding) sources and the more basic papers have more*"<sup>14</sup>.

1  
2  
3  
4  
5 An interesting direction for future research work on clinical guidelines would be to  
6 investigate whether the high proportion of cited publications with at least one UK  
7 author in UK clinical guidelines could be the result of a specific funding strategy.  
8 That is, some research could be being funded to help create evidence for the  
9 development of clinical guidelines. This specific funding strategy might explain  
10 partially why UK-authored publications are over-cited in UK guidelines, relative to  
11 the share of publications.  
12  
13  
14  
15  
16  
17  
18  
19

20 The advice given to funding recipients by UK funders regarding how they should  
21 be acknowledged in publications, and the extent to which these requirements  
22 have been enforced, has varied significantly over the last two decades. While  
23 most funders have included a requirement for acknowledgement in their terms  
24 and conditions of award, it has only been since 2008 that there has been  
25 published guidance about a standard format<sup>23</sup>. This may explain why industry is  
26 fairly highly cited across both guidelines as part of a researcher's more stringent  
27 contractual obligations. However, it is worth noting that the extent to which  
28 researchers are following the standard format is unknown. Furthermore, the  
29 reality remains that, given the incremental nature of much research, it is not easy  
30 to precisely attribute a publication to its source of funding.  
31  
32  
33  
34  
35  
36  
37  
38  
39  
40  
41  
42  
43

44 One broader question is how to ensure that research information is accessible is  
45 required in order to avoid spending funds on research that either cannot be used  
46 or may be duplication<sup>24</sup>.  
47  
48  
49  
50  
51

## 52 **Temporal issues**

53 We did find a correlation between the publication of the clinical guidelines and the  
54 dates of the papers cited within it. These results corroborate earlier research<sup>14</sup>.  
55  
56  
57  
58  
59  
60

1  
2  
3 Other bibliometric studies on UK clinical guidelines also found that a significant  
4 share of publications cited are published within 10 years before the release of  
5 these guidelines<sup>19,25</sup>  
6  
7

8  
9  
10 Therefore, this finding was not unexpected, since clinical guidelines should be  
11 based on new evidence, although on occasion the newest evidence may not be  
12 the best. However, it would be interesting to investigate whether the most recent  
13 publications cited are the outcome of research specifically funded to support the  
14 development of a clinical guideline, thus potentially explaining the peak in  
15 publications cited in the two guidelines a few years before their release.  
16  
17  
18  
19  
20

### 21 22 **National contributions**

23  
24 The UK's contribution is high in both guidelines, since its world share in medical  
25 research measured by its share in the total number of publications published in  
26 the field amounted to approximately 8.6% in 2006<sup>26</sup>. This high proportion of  
27 papers linked to UK-based authors echoes the finding of previous studies.  
28  
29 Interestingly, our analysis – where around a third of papers are linked to UK-  
30 based authors - reveals a higher proportion than we have seen in other analyses.  
31  
32  
33  
34  
35  
36  
37  
38  
39

### 40 41 **Conclusions and recommendations**

42  
43 Having greater access to the work cited on clinical guidelines would present new  
44 opportunities for funders and the research community alike to better understand  
45 some of the mechanisms that take research from the lab to the bedside. While  
46 this would be but one tool in the research impact evaluator's toolkit, it would be  
47 one that could be relatively easy to harness if both access and acknowledgements  
48 were improved. As described, work is underway between the UK NICE and the  
49 NCBI, and in the future, it is envisioned that other guideline providers will make  
50 their content available in much more structured and accessible formats to permit  
51 analyses of this nature.  
52  
53  
54  
55  
56  
57  
58  
59  
60

1  
2  
3  
4  
5 However, to bring clarity to the tracking of research inputs through to published  
6 output, the age-old problem of ensuring accurate and complete acknowledgement  
7 information on peer-reviewed published work needs to be addressed. This  
8  
9 requires a change in the culture of how researchers use acknowledgements and  
10 greater liaison with publishers and information providers who could do much to  
11 enhance the quality and completeness of funding data as a paper is submitted for  
12 publication. Clarity and perhaps demarcation between the requirements of an  
13 'acknowledgement' section on a paper and description of the 'funding' that has  
14 supported the work would seem an easy step to help remedy this<sup>27</sup>. This is  
15 particularly pertinent as information providers such as Thomson Reuters and  
16 Elsevier are now developing complex reporting and analytical tools that provide  
17 an ability to scrutinise the characteristics of published work – including who is  
18 described as funding the work - in new and exciting ways.  
19  
20  
21  
22  
23  
24  
25  
26  
27  
28  
29  
30  
31

32 Furthermore, if the methodology of this paper is to be generalised both beyond  
33 formal guidelines and to other healthcare delivery and research output systems  
34 and metrics, then novel methods of identifying and tracking researcher and their  
35 outputs, such via global identifier systems such as that proposed by the ORCID<sup>28</sup>  
36 (Open and Researcher Contributor ID) initiative, will be important.  
37  
38  
39  
40  
41  
42  
43

44 Moves to address the definition of an 'acknowledgement' may also help to  
45 address the issue of 'over-authorship' and author inflation that has been seen in  
46 recent years. This is thought to be fuelled in part by the drive towards impact  
47 assessment through national research allocation formulae; such as the UK  
48 Research Assessment Exercise<sup>29</sup>. Some contributors listed as 'authors' might be  
49 more appropriately 'thanked'. Many journals now contain a section that asks for a  
50 description of 'contributions' – these often do not contain all those listed in the  
51  
52  
53  
54  
55  
56  
57  
58  
59  
60



1  
2  
3 author list so there may be a place for a more defined 'acknowledgement as  
4  
5 thanks' section.  
6  
7

8  
9 Funders should also ensure clarity around their requirements for a 'funding  
10  
11 acknowledgement'. Complexities arise for example, when research takes place in  
12  
13 buildings funded by a specific donor or when a specific piece of research uses a  
14  
15 piece of equipment funded by a specific donor. And for how long after funding has  
16  
17 been received by a researcher should they continue to provide a funding  
18  
19 acknowledgement?  
20

21  
22 We found that there is great potential for national and international guidelines to  
23  
24 be used as sources of information to help further our understanding on the  
25  
26 impact of research on practice; the challenge is to be able to harness that  
27  
28 information in an efficient way – so that we are able to use this information to  
29  
30 feed into future research strategy and thereby make the research cycle more  
31  
32 effective.  
33  
34  
35  
36  
37  
38  
39  
40  
41  
42  
43  
44  
45  
46  
47  
48  
49  
50  
51  
52  
53  
54  
55  
56  
57  
58  
59  
60

## 8. Acknowledgements

The authors are employed at the Medical Research Council, the Wellcome Trust and the National Institute of Health Research, Department of Health.

We thank RAND Europe for their work on the study that this paper is based on. We also thank Centre for Science and Technology Studies (CWTS) and Leiden University (Netherlands) for bibliometric analysis.

## 9. References

- 1 - Robert Evans, Inna Kotchetkova, Susanne Langer. Just around the corner: rhetorics of progress and promise in genetic research. *Public Understanding of Science*. January 2009 18: 43-59.
- 2 - Increasing the economic impact of Research Councils. Peter Warry for DTI. 2006
- 3 - House of Commons Health Committee. 'The Use of New Medical Technologies within the NHS: Fifth Report of Session 2004-05.' Vol. 1. April 2005. [Available at: [http://www.parliament.the-stationeryoffice.co.uk/pa/cm200405/cmselect/cmhealth/39\\_8/398i.pdf](http://www.parliament.the-stationeryoffice.co.uk/pa/cm200405/cmselect/cmhealth/39_8/398i.pdf) ]
- 4 - Government response to the Health Committee's report on the use of new medical technologies within the NHS. [Available at: [www.dh.gov.uk/PublicationsAndStatistics/Publications/PublicationsPolicyAndGuidance/PublicationsPolicyAndGuidanceArticle/fs/en?CONTENT\\_ID=4120880&chk=PtjqE5](http://www.dh.gov.uk/PublicationsAndStatistics/Publications/PublicationsPolicyAndGuidance/PublicationsPolicyAndGuidanceArticle/fs/en?CONTENT_ID=4120880&chk=PtjqE5)]
- 5 - Sir David Cooksey. 'A Review of Health Research Funding'. 2006. [Available at: [www.hm-treasury.gov.uk/independent\\_reviews/cooksey\\_review/cookseyreview\\_index.cfm](http://www.hm-treasury.gov.uk/independent_reviews/cooksey_review/cookseyreview_index.cfm)]
- 6 - Sir Derek Wanless. 'Securing our Future Health: Taking a Long-Term View.' April 2002. [Available at: [http://www.hm-treasury.gov.uk/consult\\_wanless\\_final.htm](http://www.hm-treasury.gov.uk/consult_wanless_final.htm)]

- 1  
2  
3 7 - Healthcare Industries Task Force. 'Better health through partnership: a  
4 programme for action. Final report.' November 2004. [Available at:  
5 www.advisorybodies.dh.gov.uk/hitf]  
6  
7  
8  
9 8 - National Institutes of Health, FY 2000 Research Program Outcomes  
10 Assessment Material. US Department of Health and Human Services. Bethesda,  
11 Maryland: National Institutes of Health, 2000.  
12  
13  
14 9 - Smith, R., Measuring the social impact of research. British Medical Journal,  
15 323, 2001, 528.  
16  
17  
18  
19 10 - World Health Organization, National Health Research Systems – Report of  
20 an International Workshop. Geneva: World Health Organization, 2002.  
21  
22  
23  
24 11 - Grant, J., S Hanney and M Buxton, Academic medicine: time for reinvention.  
25 Research needs researching (Letter). British Medical Journal, 328, 2004 (3  
26 January), 48.  
27  
28  
29  
30 12 - More information can be found at [<http://www.nice.org.uk/aboutnice/>]  
31 (accessed on Dec 14, 2010)  
32  
33  
34 13 - G Lewison and R Sullivan. The impact of cancer research: how publications  
35 influence UK cancer clinical guidelines. British Journal of Cancer (2008) 98, 1944–  
36 1950.  
37  
38  
39  
40 14 - J Kryworuchko, D Stacey, N Bai and ID Graham. Twelve years of clinical  
41 practice guideline development, dissemination and evaluation in Canada (1994 to  
42 2005). Implementation Science 2009, 4:49.  
43  
44  
45  
46 15 - <http://guidance.nice.org.uk/CG12>  
47  
48  
49 16 - <http://guidance.nice.org.uk/CG42>  
50  
51  
52 17 - E Hassan, H Ridsdale, J Grant, SE Kirk. Funding and performance on clinical  
53 guidelines: The cases of dementia and chronic obstructive pulmonary disease.  
54 Documented Briefing DB-597. April 2010.  
55  
56  
57  
58  
59  
60

1  
2  
3 18 - Web of Science -

4 [http://apps.isiknowledge.com/UA\_GeneralSearch\_input.do?product=UA&search\_  
5 mode=GeneralSearch&SID=N2bc@1PAg2BOeGMBngf&preferencesSaved=].

6 Accessed December 2010.  
7  
8  
9

10 19 - Grant, J., Cottrell, R., Cluzeau, F., et al (2000), "Evaluating 'payback' on  
11 biomedical research from papers cited in clinical guidelines: applied bibliometric  
12 study", BMJ, Vol. 320 No.7242, pp.1107-11.  
13  
14

15 20 - Dawson, G., Lucocq, B., Cottrell, R., et al (1998) Mapping the landscape.  
16 National Biomedical Research Outputs 1988-95. London: WellcomeTrust.  
17  
18

19 21 - Webster BM, Lewison G, Rowlands I. Mapping the Landscape II: Biomedical  
20 Research in the UK, 1989-2002 2003. Department of Information Science, The  
21 City University.  
22  
23

24 22 - Adams, J., Gurney, K & Marshall, S (2007). Profiling citation impact: a new  
25 methodology, *Scientometrics*, 72, 325-344.  
26  
27

28 23 - Acknowledgement of Funders in Scholarly Journal Articles: Guidance for UK  
29 Research Funders, Authors and Publishers. 2008. Research Information Network.  
30 Accessible at [http://www.rin.ac.uk/our-work/research-funding-policy-and-  
31 guidance/acknowledgement-funders-journal-articles] on Dec 21, 2010.  
32  
33

34 24 - Chalmers, I. & Glasziou, P. (2009) Avoidable waste in the production and  
35 reporting of research evidence *The Lancet*, 374, 9683: 86-89.  
36  
37

38 25 - Buxton M, Hanney S, Morris S, Sundmacher L - Health Economics Research  
39 Group, Office of Health Economics, RAND Europe (2008) Medical Research -  
40 What's it worth? Estimating the economic benefits from medical research in the  
41 UK. London: UK Evaluation Forum  
42  
43

44 26 - Hassan, E. (2009) Health and Medical Research in France - Observatory on  
45 Health Research Systems. RAND Documented Briefing.  
46  
47

48 27 - Giles, C.L & Councill, I.G. (2004) Who gets acknowledged: Measuring  
49 scientific contributions through automatic acknowledgment indexing *PNAS*,  
50 101(51): 17599 - 17604.  
51  
52  
53  
54  
55  
56  
57  
58  
59  
60

1  
2  
3  
4 28 - Open and Researcher Contributor ID: [www.orcid.org](http://www.orcid.org)  
5  
6

7 29 - Walker , C. G. et al (2010) Authors' opinions on publication in relation to  
8 annual performance assessment. BMC Medical Education 2010, 10  
9 (21doi:10.1186/1472-6920-10-21).  
10  
11

### 12 13 **Contributorship**

14  
15 All authors (DK, LA, KD, BS and IV) contributed extensively to all parts of  
16 this paper and commented on the manuscript at all stages. All authors were  
17 involved in the design of the study with some guidance on direction and  
18 feasibility from RAND Europe. All of the authors discussed the  
19 interpretation of the results of the study, and agreed the outline content  
20 for this publication. DK wrote the initial draft of the paper which was then  
21 reviewed and further shaped by all of the authors. BS prepared the final  
22 version of the paper plus all related information; **and managed the submission and**  
23 **revision of this article.**  
24

### 25 **Data sharing**

26 Unpublished data from this study is not currently available.  
27

### 28 **Funding**

29  
30 Funded by Medical Research Council, National Institute of Health Research, Wellcome Trust  
31  
32  
33  
34  
35  
36  
37  
38  
39  
40  
41  
42  
43  
44  
45  
46  
47  
48  
49  
50  
51  
52  
53  
54  
55  
56  
57  
58  
59  
60

1  
2  
3  
4  
5  
6  
7  
8  
9  
10  
11  
12  
13  
14  
15  
16  
17  
18  
19  
20  
21  
22  
23  
24  
25  
26  
27  
28  
29  
30  
31  
32  
33  
34  
35  
36  
37  
38  
39  
40  
41  
42  
43  
44  
45  
46  
47  
48  
49  
50  
51  
52  
53  
54  
55  
56  
57  
58  
59  
60

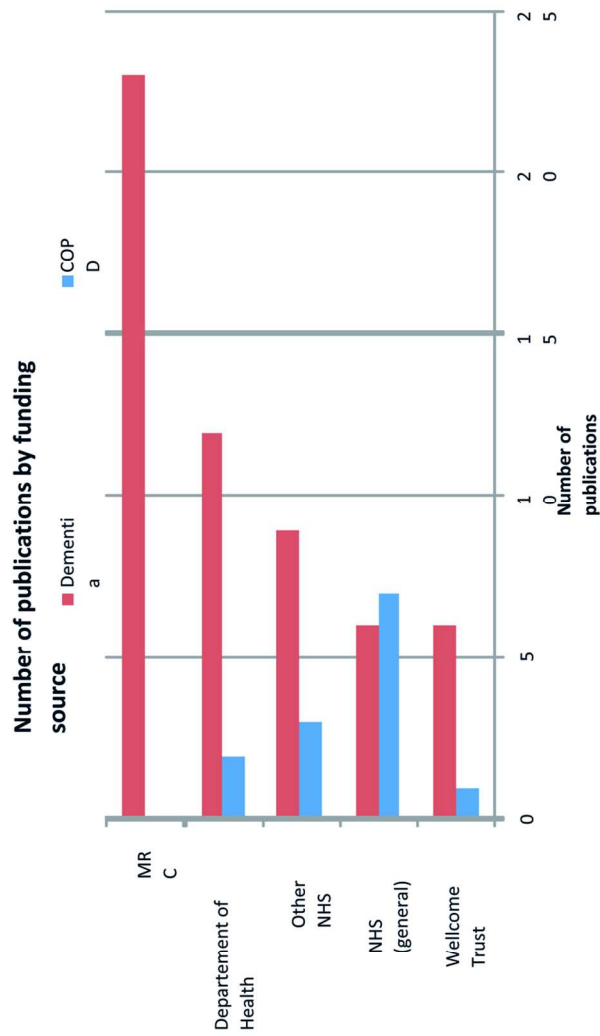

Numbers of publications by funding source.  
85x147mm (300 x 300 DPI)

1  
2  
3  
4  
5  
6  
7  
8  
9  
10  
11  
12  
13  
14  
15  
16  
17  
18  
19  
20  
21  
22  
23  
24  
25  
26  
27  
28  
29  
30  
31  
32  
33  
34  
35  
36  
37  
38  
39  
40  
41  
42  
43  
44  
45  
46  
47  
48  
49  
50  
51  
52  
53  
54  
55  
56  
57  
58  
59  
60

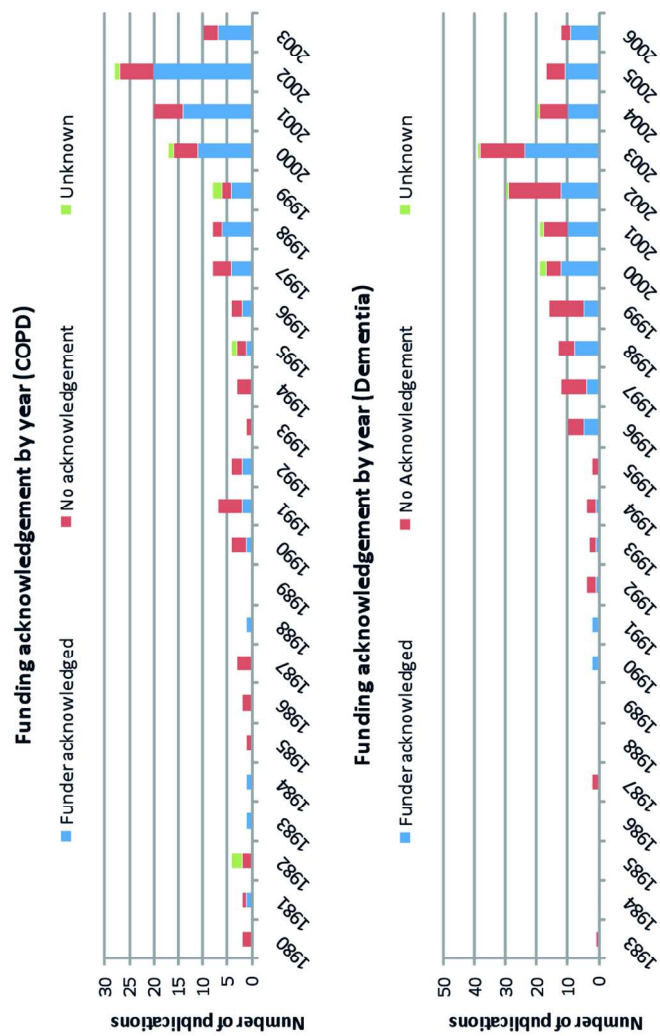

Funding acknowledgement by year.  
85x147mm (300 x 300 DPI)

1  
2  
3  
4  
5  
6  
7  
8  
9  
10  
11  
12  
13  
14  
15  
16  
17  
18  
19  
20  
21  
22  
23  
24  
25  
26  
27  
28  
29  
30  
31  
32  
33  
34  
35  
36  
37  
38  
39  
40  
41  
42  
43  
44  
45  
46  
47  
48  
49  
50  
51  
52  
53  
54  
55  
56  
57  
58  
59  
60

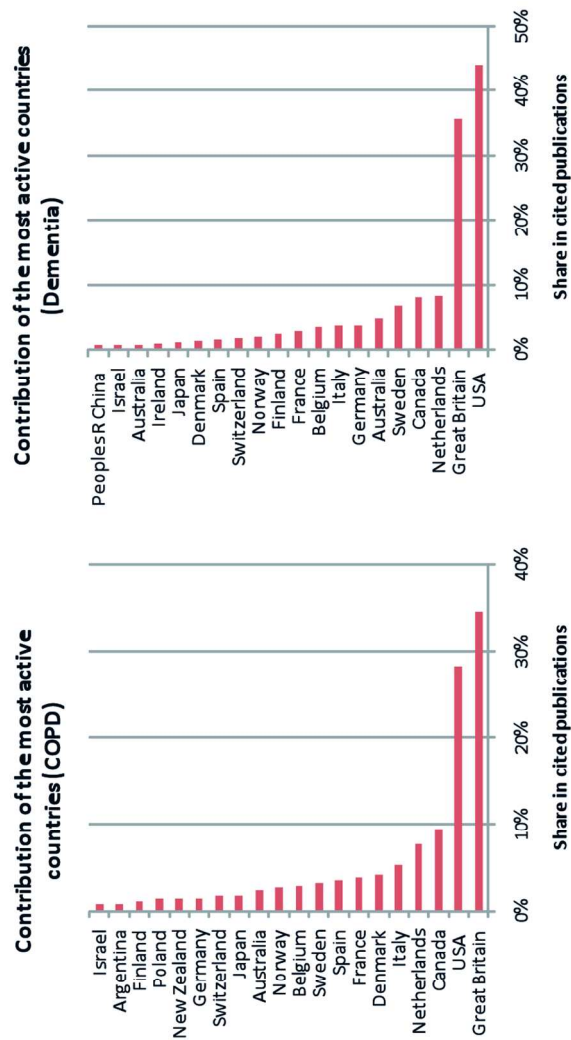

Contribution of the most active countries.  
85x147mm (300 x 300 DPI)



1  
2  
3  
4  
5  
6  
7  
8  
9  
10  
11  
12  
13  
14  
15  
16  
17  
18  
19  
20  
21  
22  
23  
24  
25  
26  
27  
28  
29  
30  
31  
32  
33  
34  
35  
36  
37  
38  
39  
40  
41  
42  
43  
44  
45  
46  
47  
48  
49  
50  
51  
52  
53  
54  
55  
56  
57  
58  
59  
60

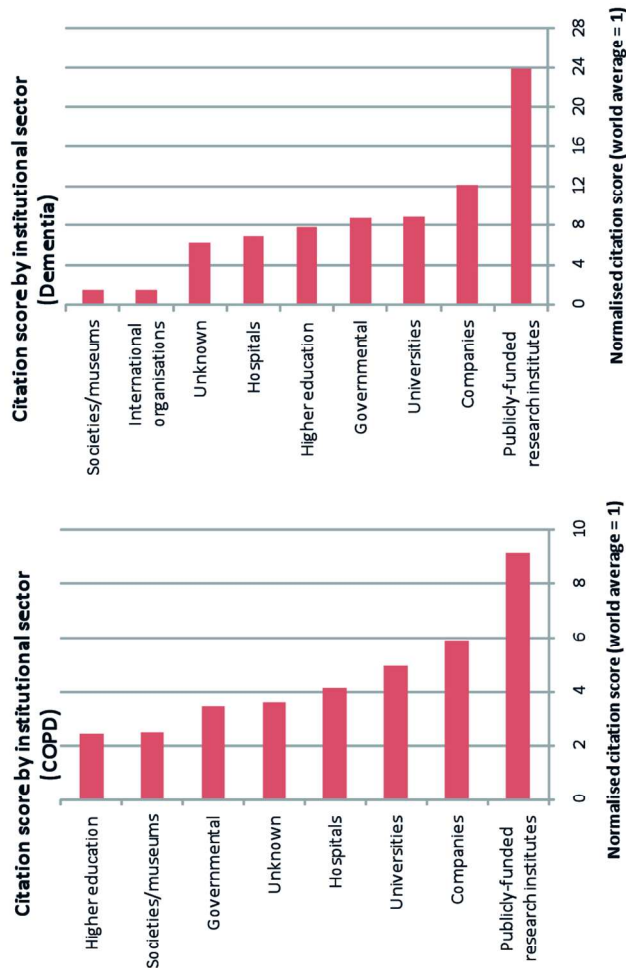

Citation score by institutional sector  
85x147mm (300 x 300 DPI)

# Please wait...

If this message is not eventually replaced by the proper contents of the document, your PDF viewer may not be able to display this type of document.

You can upgrade to the latest version of Adobe Reader for Windows®, Mac, or Linux® by visiting <http://www.adobe.com/products/acrobat/readstep2.html>.

For more assistance with Adobe Reader visit <http://www.adobe.com/support/products/acrreader.html>.

Windows is either a registered trademark or a trademark of Microsoft Corporation in the United States and/or other countries. Mac is a trademark of Apple Inc., registered in the United States and other countries. Linux is the registered trademark of Linus Torvalds in the U.S. and other countries.

# Please wait...

If this message is not eventually replaced by the proper contents of the document, your PDF viewer may not be able to display this type of document.

You can upgrade to the latest version of Adobe Reader for Windows®, Mac, or Linux® by visiting [http://www.adobe.com/go/reader\\_download](http://www.adobe.com/go/reader_download).

For more assistance with Adobe Reader visit <http://www.adobe.com/go/acrreader>.

Windows is either a registered trademark or a trademark of Microsoft Corporation in the United States and/or other countries. Mac is a trademark of Apple Inc., registered in the United States and other countries. Linux is the registered trademark of Linus Torvalds in the U.S. and other countries.

# Please wait...

If this message is not eventually replaced by the proper contents of the document, your PDF viewer may not be able to display this type of document.

You can upgrade to the latest version of Adobe Reader for Windows®, Mac, or Linux® by visiting [http://www.adobe.com/go/reader\\_download](http://www.adobe.com/go/reader_download).

For more assistance with Adobe Reader visit <http://www.adobe.com/go/acrreader>.

Windows is either a registered trademark or a trademark of Microsoft Corporation in the United States and/or other countries. Mac is a trademark of Apple Inc., registered in the United States and other countries. Linux is the registered trademark of Linus Torvalds in the U.S. and other countries.



## ICMJE Form for Disclosure of Potential Conflicts of Interest

### Instructions

**The purpose of this form is to provide readers of your manuscript with information about your other interests that could influence how they receive and understand your work. The form is designed to be completed electronically and stored electronically. It contains programming that allows appropriate data display. Each author should submit a separate form and is responsible for the accuracy and completeness of the submitted information. The form is in four parts.**

#### 1. Identifying information.

Enter your full name. If you are NOT the corresponding author please check the box "no" and a space to enter the name of the corresponding author in the space that appears. Provide the requested manuscript information. Double-check the manuscript number and enter it.

#### 2. The work under consideration for publication.

This section asks for information about the work that you have submitted for publication. The time frame for this reporting is that of the work itself, from the initial conception and planning to the present. The requested information is about resources that you received, either directly or indirectly (via your institution), to enable you to complete the work. Checking "No" means that you did the work without receiving any financial support from any third party -- that is, the work was supported by funds from the same institution that pays your salary and that institution did not receive third-party funds with which to pay you. If you or your institution received funds from a third party to support the work, such as a government granting agency, charitable foundation or commercial sponsor, check "Yes". Then complete the appropriate boxes to indicate the type of support and whether the payment went to you, or to your institution, or both.

#### 3. Relevant financial activities outside the submitted work.

This section asks about your financial relationships with entities in the bio-medical arena that could be perceived to influence, or that give the appearance of potentially influencing, what you wrote in the submitted work. You should disclose interactions with ANY entity that could be considered broadly relevant to the work. For example, if your article is about testing an epidermal growth factor receptor (EGFR) antagonist in lung cancer, you should report all associations with entities pursuing diagnostic or therapeutic strategies in cancer in general, not just in the area of EGFR or lung cancer.

Report all sources of revenue paid (or promised to be paid) directly to you or your institution on your behalf over the 36 months prior to submission of the work. This should include all monies from sources with relevance to the submitted work, not just monies from the entity that sponsored the research. Please note that your interactions with the work's sponsor that are outside the submitted work should also be listed here. If there is any question, it is usually better to disclose a relationship than not to do so.

For grants you have received for work outside the submitted work, you should disclose support ONLY from entities that could be perceived to be affected financially by the published work, such as drug companies, or foundations supported by entities that could be perceived to have a financial stake in the outcome. Public funding sources, such as government agencies, charitable foundations or academic institutions, need not be disclosed. For example, if a government agency sponsored a study in which you have been involved and drugs were provided by a pharmaceutical company, you need only list the pharmaceutical company.

#### 4. Other relationships.

Use this section to report other relationships or activities that readers could perceive to have influenced, or that give the appearance of potentially influencing, what you wrote in the submitted work.

1  
2  
3 London , WC2B 4AN

4  
5 Phone: +44 (0)20 7395 2208

6  
7 Email

8  
9  
10 beverley.sherbon@headoffice.mrc.ac.uk (this email address can be published)

11  
12  
13  
14 Reprints are not available from the authors.

15  
16  
17  
18 Source(s) of support: The authors are employed, or supported by, the Medical  
19  
20 Research Council, National Institute of Health Research and Wellcome Trust.

21  
22  
23  
24 Word count (text only - excluding abstract, acknowledgments, figure legends, and  
25  
26 references): 3208

27  
28 Word count for the Abstract: 282

29  
30 Number of figures and tables: 4

31  
32  
33  
34 The Corresponding Author has the right to grant on behalf of all authors and does  
35  
36 grant on behalf of all authors, a non-exclusive licence on a worldwide basis to the  
37  
38 BMJ Publishing Group Ltd and its licensees, to permit this article (if accepted) to  
39  
40 be published in BMJ editions and any other BMJPG products and to exploit all  
41  
42 subsidiary rights, as set out in our licence  
43  
44  
45 (<http://resources.bmj.com/bmj/authors/checklists-forms/licence-for-publication>)  
46  
47  
48  
49  
50  
51  
52  
53  
54  
55  
56  
57  
58  
59  
60

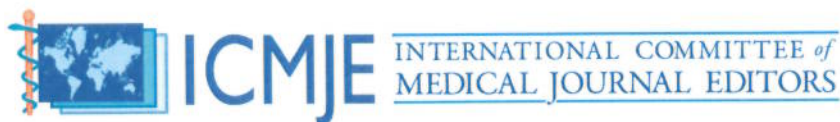

## ICMJE Form for Disclosure of Potential Conflicts of Interest

### Section 1. Identifying Information

1. Given Name (First Name) **BEVERLEY**      2. Surname (Last Name) **SHERBON**      3. Effective Date (07-August-2008) **21 - NOV - 2011**
4. Are you the corresponding author?  Yes  No
5. Manuscript Title **TRACKING THE IMPACT OF RESEARCH ON POLICY & PRACTICE : THE USE OF CLINICAL GUIDELINES IN RESEARCH EVALUATION.**
6. Manuscript Identifying Number (if you know it)

### Section 2. The Work Under Consideration for Publication

Did you or your institution at any time receive payment or services from a third party for any aspect of the submitted work (including but not limited to grants, data monitoring board, study design, manuscript preparation, statistical analysis, etc...)?

Complete each row by checking "No" or providing the requested information. **If you have more than one relationship click the "Add" button to add a row. Excess rows can be removed by clicking the "X" button.**

#### The Work Under Consideration for Publication

| Type                                                                                                                                    | No                                  | Money Paid to You        | Money to Your Institution* | Name of Entity | Comments** |     |
|-----------------------------------------------------------------------------------------------------------------------------------------|-------------------------------------|--------------------------|----------------------------|----------------|------------|-----|
| 1. Grant                                                                                                                                | <input checked="" type="checkbox"/> | <input type="checkbox"/> | <input type="checkbox"/>   |                |            | X   |
|                                                                                                                                         |                                     |                          |                            |                |            | ADD |
| 2. Consulting fee or honorarium                                                                                                         | <input checked="" type="checkbox"/> | <input type="checkbox"/> | <input type="checkbox"/>   |                |            | X   |
|                                                                                                                                         |                                     |                          |                            |                |            | ADD |
| 3. Support for travel to meetings for the study or other purposes                                                                       | <input checked="" type="checkbox"/> | <input type="checkbox"/> | <input type="checkbox"/>   |                |            | X   |
|                                                                                                                                         |                                     |                          |                            |                |            | ADD |
| 4. Fees for participation in review activities such as data monitoring boards, statistical analysis, end point committees, and the like | <input checked="" type="checkbox"/> | <input type="checkbox"/> | <input type="checkbox"/>   |                |            | X   |
|                                                                                                                                         |                                     |                          |                            |                |            | ADD |
| 5. Payment for writing or reviewing the manuscript                                                                                      | <input checked="" type="checkbox"/> | <input type="checkbox"/> | <input type="checkbox"/>   |                |            | X   |
|                                                                                                                                         |                                     |                          |                            |                |            | ADD |
| 6. Provision of writing assistance, medicines, equipment, or administrative support                                                     | <input checked="" type="checkbox"/> | <input type="checkbox"/> | <input type="checkbox"/>   |                |            | X   |



## ICMJE Form for Disclosure of Potential Conflicts of Interest

| The Work Under Consideration for Publication |                                     |                          |                            |                |            |     |
|----------------------------------------------|-------------------------------------|--------------------------|----------------------------|----------------|------------|-----|
| Type                                         | No                                  | Money Paid to You        | Money to Your Institution* | Name of Entity | Comments** |     |
| 7. Other                                     | <input checked="" type="checkbox"/> | <input type="checkbox"/> | <input type="checkbox"/>   |                |            | ADD |
|                                              |                                     |                          |                            |                |            | X   |
|                                              |                                     |                          |                            |                |            | ADD |

\* This means money that your institution received for your efforts on this study.

\*\* Use this section to provide any needed explanation.

### Section 3. Relevant financial activities outside the submitted work.

Place a check in the appropriate boxes in the table to indicate whether you have financial relationships (regardless of amount of compensation) with entities as described in the instructions. Use one line for each entity; add as many lines as you need by clicking the "Add +" box. You should report relationships that were present during the 36 months prior to submission.

Complete each row by checking "No" or providing the requested information. **If you have more than one relationship click the "Add" button to add a row. Excess rows can be removed by clicking the "X" button.**

| Relevant financial activities outside the submitted work      |                                     |                          |                            |        |          |     |
|---------------------------------------------------------------|-------------------------------------|--------------------------|----------------------------|--------|----------|-----|
| Type of Relationship (in alphabetical order)                  | No                                  | Money Paid to You        | Money to Your Institution* | Entity | Comments |     |
| 1. Board membership                                           | <input checked="" type="checkbox"/> | <input type="checkbox"/> | <input type="checkbox"/>   |        |          | X   |
|                                                               |                                     |                          |                            |        |          | ADD |
| 2. Consultancy                                                | <input checked="" type="checkbox"/> | <input type="checkbox"/> | <input type="checkbox"/>   |        |          | X   |
|                                                               |                                     |                          |                            |        |          | ADD |
| 3. Employment                                                 | <input checked="" type="checkbox"/> | <input type="checkbox"/> | <input type="checkbox"/>   |        |          | X   |
|                                                               |                                     |                          |                            |        |          | ADD |
| 4. Expert testimony                                           | <input checked="" type="checkbox"/> | <input type="checkbox"/> | <input type="checkbox"/>   |        |          | X   |
|                                                               |                                     |                          |                            |        |          | ADD |
| 5. Grants/grants pending                                      | <input checked="" type="checkbox"/> | <input type="checkbox"/> | <input type="checkbox"/>   |        |          | X   |
|                                                               |                                     |                          |                            |        |          | ADD |
| 6. Payment for lectures including service on speakers bureaus | <input checked="" type="checkbox"/> | <input type="checkbox"/> | <input type="checkbox"/>   |        |          | X   |
|                                                               |                                     |                          |                            |        |          | ADD |
| 7. Payment for manuscript preparation                         | <input checked="" type="checkbox"/> | <input type="checkbox"/> | <input type="checkbox"/>   |        |          | X   |



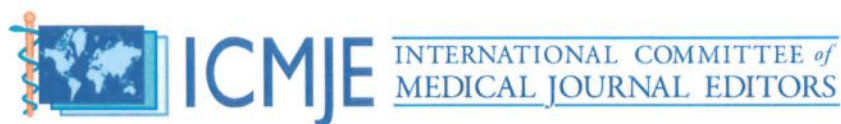

## ICMJE Form for Disclosure of Potential Conflicts of Interest

### Relevant financial activities outside the submitted work

| Type of Relationship (in alphabetical order)                                | No                                  | Money Paid to You        | Money to Your Institution* | Entity | Comments |     |
|-----------------------------------------------------------------------------|-------------------------------------|--------------------------|----------------------------|--------|----------|-----|
| 8. Patents (planned, pending or issued)                                     | <input checked="" type="checkbox"/> | <input type="checkbox"/> | <input type="checkbox"/>   |        |          | ADD |
|                                                                             |                                     |                          |                            |        |          | X   |
|                                                                             |                                     |                          |                            |        |          | ADD |
| 9. Royalties                                                                | <input checked="" type="checkbox"/> | <input type="checkbox"/> | <input type="checkbox"/>   |        |          | X   |
|                                                                             |                                     |                          |                            |        |          | ADD |
| 10. Payment for development of educational presentations                    | <input checked="" type="checkbox"/> | <input type="checkbox"/> | <input type="checkbox"/>   |        |          | X   |
|                                                                             |                                     |                          |                            |        |          | ADD |
| 11. Stock/stock options                                                     | <input checked="" type="checkbox"/> | <input type="checkbox"/> | <input type="checkbox"/>   |        |          | X   |
|                                                                             |                                     |                          |                            |        |          | ADD |
| 12. Travel/accommodations/meeting expenses unrelated to activities listed** | <input checked="" type="checkbox"/> | <input type="checkbox"/> | <input type="checkbox"/>   |        |          | X   |
|                                                                             |                                     |                          |                            |        |          | ADD |
| 13. Other (err on the side of full disclosure)                              | <input checked="" type="checkbox"/> | <input type="checkbox"/> | <input type="checkbox"/>   |        |          | X   |
|                                                                             |                                     |                          |                            |        |          | ADD |

\* This means money that your institution received for your efforts.

\*\* For example, if you report a consultancy above there is no need to report travel related to that consultancy on this line.

### Section 4. Other relationships

Are there other relationships or activities that readers could perceive to have influenced, or that give the appearance of potentially influencing, what you wrote in the submitted work?

No other relationships/conditions/circumstances that present a potential conflict of interest

Yes, the following relationships/conditions/circumstances are present (explain below):

At the time of manuscript acceptance, journals will ask authors to confirm and, if necessary, update their disclosure statements. On occasion, journals may ask authors to disclose further information about reported relationships.

Hide All Table Rows Checked 'No'

SAVE

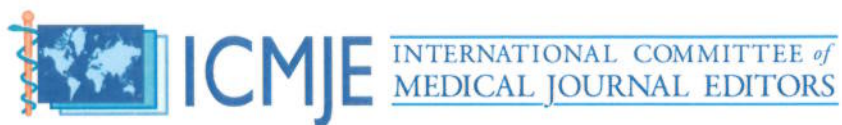

## ICMJE Form for Disclosure of Potential Conflicts of Interest

---

### Evaluation and Feedback

Please visit <http://www.icmje.org/cgi-bin/feedback> to provide feedback on your experience with completing this form.

# Please wait...

If this message is not eventually replaced by the proper contents of the document, your PDF viewer may not be able to display this type of document.

You can upgrade to the latest version of Adobe Reader for Windows®, Mac, or Linux® by visiting [http://www.adobe.com/go/reader\\_download](http://www.adobe.com/go/reader_download).

For more assistance with Adobe Reader visit <http://www.adobe.com/go/acrreader>.

Windows is either a registered trademark or a trademark of Microsoft Corporation in the United States and/or other countries. Mac is a trademark of Apple Inc., registered in the United States and other countries. Linux is the registered trademark of Linus Torvalds in the U.S. and other countries.
